# Supplementary material for: Preparation of organocobalt(iii) complexes via O2 activation
Source: Royal Society of Chemistry journal article supplement (doi:10.1039/d1dt00563d), 2021-01-01
Supplement: d1dt00563d1.pdf [file d1dt00563d1.pdf]

SUPPORTING INFORMATION

**Preparation of Organocobalt(III) Complexes via O<sub>2</sub> Activation**

Mads S. Møller, Jacob Kongsted, Christine J. McKenzie

**Index**

|                                                                |    |
|----------------------------------------------------------------|----|
| Instrumentation .....                                          | 2  |
| Single crystal x-ray diffraction .....                         | 2  |
| Computational details .....                                    | 3  |
| Synthesis .....                                                | 4  |
| Photolysis of Co(salen)CH <sub>2</sub> COCH <sub>3</sub> ..... | 8  |
| Figures.....                                                   | 9  |
| Crystal data and extra images .....                            | 13 |
| NMR spectra .....                                              | 18 |
| DFT coordinates.....                                           | 26 |
| References.....                                                | 51 |

## Instrumentation

IR spectra were recorded on a PerkinElmer Spectrum 65 (FT-ATR diamond anvil) on the neat samples. All spectra have been ATR- and baseline-corrected and were normalised with regards to the most intensely absorbing band. Thermal analysis was carried out on a Perkin Elmer TGA 4000 from 30-350 °C at 5 °C/min in a nitrogen atmosphere with a purge rate of 20 mL/min. UV-vis spectra were recorded on an Agilent 8453 spectrophotometer in 1 cm quartz cuvettes, irradiation was supplied by a 365 nm LED laser, (M365FP1, 1200 mA, Thorlabs). <sup>1</sup>H NMR (400.12 MHz) and <sup>13</sup>C NMR (100.61 MHz) solution spectra were recorded on a Bruker AVANCE III 400 FT spectrophotometer at ambient temperature. Chemical shifts ( $\delta$ ) are denoted relative to the residual solvent peak (*d*<sub>6</sub>-DMSO:  $\delta_{\text{H}} = 2.50$  ppm,  $\delta_{\text{C}} = 39.52$  ppm). <sup>13</sup>C CPMAS NMR (500 or 600 MHz) solid-state spectra were recorded on either a Varian INOVA 500 MHz NMR spectrometer (11.7 T) or a Varian INOVA 600 MHz NMR spectrometer (14.1 T) using a 3.2 mm HX MAS probe and a spinning speed of 15 kHz. Chemical shifts ( $\delta$ ) are corrected relative to adamantane ( $\delta_{\text{C}} = 38.5$  ppm). EPR spectra (X-band) were recorded on a Bruker EMX Plus CW spectrometer (Gain: 30 dB, mod. amp.: 10 G, attenuation: 10 dB) on frozen solutions at 100 K. The software packages eview and esimX were used for simulation.<sup>1</sup> Mass spectra are recorded with Electrospray ionisation (ESI) on a Bruker micrOTOF-Q II spectrometer (nanospray, capillary temperature = 180 °C, spray voltage = 3.7 kV).

## Single crystal x-ray diffraction

The crystals used for SCXRD were taken directly from the mother liquor and mounted cryogenically using Fomblin®Y to adhere the crystal to the mounting loop. X-ray crystal diffraction data was collected at 100(2) K or 293(2) K on a Synergy, Dualflex, AtlasS2 diffractometer using CuK $\alpha$  radiation ( $\lambda = 1.54184$  Å) and the CrysAlis PRO 1.171.40.21a suite<sup>2</sup> and corrected for Lorentz-polarisation effects and absorption. Using SHELXLE<sup>3</sup> the structure was solved by dual space methods (SHELXT<sup>4</sup>) and refined on F<sup>2</sup> using all the reflections (SHELXL-2018<sup>5</sup>). All the non-hydrogen atoms were refined using anisotropic atomic displacement parameters and hydrogen atoms were inserted at calculated positions using a riding model. Parameters for data collection and refinement are summarised in Table S1-S3. In Co(salen)(NO<sub>2</sub>)(H<sub>2</sub>O) the NO<sub>2</sub> group is disordered over two positions in a nitro/nitrito disorder and were refined with a final ratio of 0.37:0.63. Hydrogen atoms of the coordinate water were located from the difference maps. In [Co(salen)(NO<sub>2</sub>)<sub>2</sub>](CH<sub>3</sub>CH<sub>2</sub>NO<sub>2</sub>) it was not possible to model the distorted solvate molecule, therefore, a solvent mask was calculated, and

45 electrons were found in a volume of 170 Å<sup>3</sup> in 1 void per unit cell. This is consistent with the presence of 0.5[C<sub>2</sub>H<sub>5</sub>NO<sub>2</sub>] per Asymmetric Unit which account for 40 electrons per unit cell. Co(salen)(CH<sub>2</sub>COCH<sub>3</sub>)(MeOH) is twinned in which component two (33.36 %) was rotated by 2.72° around [-1.00 -0.03 -0.01]. This phase is known (CCDC: ESACCO)<sup>6</sup> however has a higher R-Factor and the entry does not contain any coordinates. Co(salen)(CH<sub>2</sub>COCH<sub>3</sub>)(H<sub>2</sub>O) was a weak diffractor and only room temperature data were available at meagre resolution, however, the main features of the structure are clear.

### Computational details

The electronic structure calculations considered in this work are all based on (unrestricted) density functional theory (DFT) calculations performed using Jaguar<sup>7</sup> through the Maestro graphical interface.<sup>8</sup> All structures have been geometry optimised in isolation using M06-L/LACVP+\*<sup>9,10</sup> and vibrational frequencies have also been calculated at this level of theory. Single point energies, based on the use of the M06-L/LACVP+\* geometry optimized structures, have been performed using M06-L/LACV3P\*\*. The relative energies reported are based on these single point energies but corrected for zero-point vibrational effects calculated at the M06-L/LACVP+\* level. All calculations are solution phase calculations, using the Poisson-Boltzmann solvation model. The EPR *g*-tensors were calculated using the ORCA program package using the same basis set and functional as described above.<sup>11-13</sup>

The starting structure **V** was based on the crystal structure of [(Co(salen)DMF)<sub>2</sub>O<sub>2</sub>] obtained from the Cambridge Structural Database (CCDC: DOESCF10)<sup>14</sup> in which the DMF molecules were replaced by MeOH. Following the geometry optimization, this structure was used as basis for creating the other salen-based structures in the reaction mechanism. The crystal structure of **7** was used as the starting structure for **VIII**. Smaller molecules such as O<sub>2</sub>, CH<sub>2</sub>CH<sub>2</sub> and EtNO<sub>2</sub> etc. were created in the Jaguar program using a 2D sketcher tool.

pK<sub>a</sub> values were calculated using the following set of formula from Smith *et al.*<sup>15</sup>

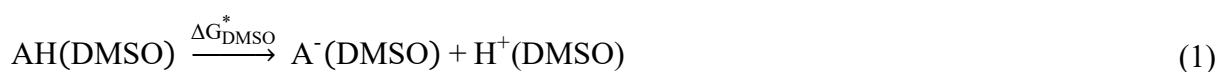

$$\text{pK}_a = \frac{\Delta G_{\text{DMSO}}^*}{2.303RT} \quad (2)$$

$$\Delta G_{\text{DMSO}}^* = G_{\text{DMSO}}^*(\text{A}^-) + G_{\text{DMSO}}^*(\text{H}^+) - G_{\text{DMSO}}^*(\text{AH}) \quad (3)$$

$$G_{\text{DMSO}}^*(\text{H}^+) = G_{\text{g}}^{\circ}(\text{H}^+) + \Delta G_{\text{DMSO,solv}}(\text{H}^+) + \Delta G^{\circ \rightarrow *} \quad (4)$$

Given the deprotonation reaction shown in equation 1, the  $\text{pK}_a$  of molecule AH was calculated according to equation 2. The free energy difference was calculated directly from the Gibbs free energies of the acid and conjugated base with equation 3. The standard state free energy of the proton was calculated according to equation 4, in which the gas-phase energy of a proton ( $G_{\text{g}}^{\circ}(\text{H}^+) = -6.29$  kcal/mol) and the experimentally measured solvation free energy ( $\Delta G_{\text{DMSO,solv}}(\text{H}^+) = -273.3$ ) were taken from the literature.<sup>15,16</sup>  $\Delta G^{\circ \rightarrow *}$  is used to convert from the 1 atm ideal gas standard state to the 1 M standard state. Where the superscripts  $\circ$  and  $*$  the 1 atm and 1 M standard states respectively.  $\Delta G^{\circ \rightarrow *} = RT \ln(24.46) = 1.89$  kcal/mol at 298 K.<sup>15</sup>

## Synthesis

N,N'-ethylenebis(salicylideneimine)<sup>17</sup> and N,N'-ethylenebis(salicylideneimine)cobalt(II)<sup>18</sup> were prepared according to literature methods. All other chemicals were purchased from Sigma-Aldrich and were used without further purification. Reactions were carried out with the exclusion of light.

**[Co(salen)(CH<sub>2</sub>NO<sub>2</sub>)]<sub>2</sub>·(2 MeNO<sub>2</sub>).** Co(salen) (0.25 g) was dissolved in boiling nitromethane (25 mL) and the solution was allowed to stir for 10 minutes with continued heating. The flask was equipped with a calcium chloride drying tube and left to stand for two days during which a green crystalline solid precipitated, which was collected by filtration (0.25 g, 73.6 %). Single crystals suitable for X-ray diffraction were obtained from the crystal floating on top of the solution.

IR (ATR-FT)  $\text{cm}^{-1}$ : 1619(vs, C=C), 1594(vs, C=N), 1496(vs,  $\nu(\text{NO}_2)$ )

<sup>1</sup>H-NMR (400.12 MHz, *d*<sub>6</sub>-DMSO):  $\delta = 8.09$  (s, 2H, N=CH), 7.20 (dd, 2H, <sup>3</sup>*J*<sub>HH</sub> = 7.75, <sup>4</sup>*J*<sub>HH</sub> = 1.84, C<sub>arom</sub>H) 7.16 (td, 2H, <sup>3</sup>*J*<sub>HH</sub> = 7.61, <sup>4</sup>*J*<sub>HH</sub> = 1.84, C<sub>arom</sub>H), 6.98 (dd, 2H, <sup>3</sup>*J*<sub>HH</sub> = 8.53, <sup>4</sup>*J*<sub>HH</sub> = 1.14, C<sub>arom</sub>H), 6.45 (td, 2H, <sup>3</sup>*J*<sub>HH</sub> = 7.28, <sup>4</sup>*J*<sub>HH</sub> = 1.19, C<sub>arom</sub>H), 5.09 (s, 2H, CH<sub>2</sub>), 3.77 (m, 4H, 2 × CH<sub>2</sub>) ppm.

<sup>13</sup>C NMR (101 MHz, *d*<sub>6</sub>-DMSO)  $\delta = 165.65$  (2 × C=N), 165.14, 133.84, 133.28, 122.22, 119.16, 113.21 (6 × C<sub>arom</sub>), 57.28 (2 × CH<sub>2</sub>) ppm.

**[Co(salen)(NO<sub>2</sub>)]<sub>2</sub>·CH<sub>3</sub>CH<sub>2</sub>NO<sub>2</sub>.** Was prepared analogously to the compound above substituting nitromethane with nitroethane, yielding a brownish-green microcrystalline solid which was collected by filtration (0.12 g, 38.9 %).

IR (ATR-FT) cm<sup>-1</sup>: 1633 (vs, C=C), 1598 (vs, C=N), 1421 (s, ν<sub>a</sub>(NO<sub>2</sub>)), 821 (s, δ<sub>s</sub>(ONO).

<sup>1</sup>H-NMR (400.12 MHz, *d*<sub>6</sub>-DMSO): δ = 8.24 (s, 2H, N=CH), 7.37 (dd, 2H, <sup>3</sup>J<sub>HH</sub> = 7.88, <sup>4</sup>J<sub>HH</sub> = 1.85, C<sub>arom</sub>H) 7.27 (td, 2H, <sup>3</sup>J<sub>HH</sub> = 7.65, <sup>4</sup>J<sub>HH</sub> = 1.82, C<sub>arom</sub>H), 7.14 (dd, 2H, <sup>3</sup>J<sub>HH</sub> = 8.48, <sup>4</sup>J<sub>HH</sub> = 1.09, C<sub>arom</sub>H), 6.54 (td, 2H, <sup>3</sup>J<sub>HH</sub> = 7.28, <sup>4</sup>J<sub>HH</sub> = 1.22, C<sub>arom</sub>H), 3.99 (s, 4H, 2 × CH<sub>2</sub>) ppm.

<sup>13</sup>C NMR (101 MHz, *d*<sub>6</sub>-DMSO) δ = 165.92 (2 × C=N), 165.85, 134.24, 133.94, 122.17, 118.84, 113.47 (6 × C<sub>arom</sub>), 58.02 (2 × CH<sub>2</sub>) ppm.

**Co(salen)(NO<sub>2</sub>)(H<sub>2</sub>O).** Was prepared analogously to the compound above omitting the drying tube during the crystallisation or by adding ethanol (5 mL, 96%) to the solution prior to crystallisation. After two days the compound was obtained as a brownish-green crystalline solid, which was collected by filtration (0.12 g, 40.9 %).

IR (ATR-FT) cm<sup>-1</sup>: 1637 (vs, C=C), 1600 (vs, C=N), 1469 (s, ν<sub>a</sub>(N=O)), 1432 (s, ν<sub>a</sub>(NO<sub>2</sub>)), 1058 (m, ν<sub>s</sub>(N-O)), 821 (vs, δ<sub>s</sub>(ONO)).

**Co(salen)(CH<sub>2</sub>COCH<sub>3</sub>)(MeOH).** Co(salen) (0.25 g) was partially dissolved in boiling acetone/methanol (3:2 V/V, 25 mL) and the solution was allowed to stand for two days in darkness, during which the colour changed from red to green. The green solution was evaporated to dryness *in vacuo*, yielding green crystals which were collected by filtration and washed with water (0.23 g, 71.3 %). It was possible to recrystallise Co(salen)(CH<sub>2</sub>COCH<sub>3</sub>)(MeOH) from by slow evaporation from an aqueous ethanol solution which yielded the corresponding hydrate Co(salen)(CH<sub>2</sub>COCH<sub>3</sub>)(H<sub>2</sub>O), in quantitative amount. Recrystallisation by diffusion of diethylether into a solution of Co(salen)(CH<sub>2</sub>COCH<sub>3</sub>)(MeOH) in benzene yielded [Co(salen)(CH<sub>2</sub>COCH<sub>3</sub>)]<sub>2</sub>·(C<sub>6</sub>H<sub>6</sub>).

IR (ATR-FT) cm<sup>-1</sup>: 3303 (vb, O-H), 1655 (m, ν(C=O)), 1625 (vs, C=C), 1599 (vs, C=N).

<sup>1</sup>H-NMR (400.12 MHz, *d*<sub>6</sub>-DMSO): δ = 8.00 (s, 2H, N=CH), 7.16 (dd, 2H, <sup>3</sup>J<sub>HH</sub> = 7.73, <sup>4</sup>J<sub>HH</sub> = 1.88, C<sub>arom</sub>H) 7.11 (td, 2H, <sup>3</sup>J<sub>HH</sub> = 7.66, <sup>4</sup>J<sub>HH</sub> = 1.81, C<sub>arom</sub>H), 6.93 (dd, 2H, <sup>3</sup>J<sub>HH</sub> = 8.42, <sup>4</sup>J<sub>HH</sub> = 1.08, C<sub>arom</sub>H), 6.41 (td, 2H, <sup>3</sup>J<sub>HH</sub> = 7.22, <sup>4</sup>J<sub>HH</sub> = 1.13, C<sub>arom</sub>H), 3.73 (m, 4H, 2 × CH<sub>2</sub>), 2.88 (s, 2H, CH<sub>2</sub>), 1.64 (s, 3H, CH<sub>3</sub>) ppm.

<sup>13</sup>C NMR (101 MHz, *d*<sub>6</sub>-DMSO) δ = 217.87 (C=O), 165.62 (2 × C=N), 164.30, 133.57, 132.71, 122.43, 119.89, 112.85 (6 × C<sub>arom</sub>), 57.87 (2 × CH<sub>2</sub>), 30.37 (CH<sub>3</sub>) ppm.

UV-vis (DCM)  $\lambda_{\max}/\text{nm}$  ( $\epsilon/\text{M}^{-1} \text{cm}^{-1}$ ): 250 (25550), 353 (6800), 784 (350).

**[Co(salen)(CH<sub>2</sub>COPh)]<sub>2</sub>.** Co(salen) (0.25 g) was dissolved in boiling acetophenone/methanol (2:3 V/V, 25 mL) and the solution was allowed to stand for two days in darkness, during which the colour changed from red to green. The solution was evaporated to almost dryness *in vacuo* and precipitated with n-hexane. The green precipitate was recrystallised from an aqueous methanol, yielding green crystals suitable for X-ray diffraction (0.18 g, 51.7 %).

IR (ATR-FT)  $\text{cm}^{-1}$ : 1681 (m,  $\nu(\text{C}=\text{O})$ ), 1631 (s,  $\text{C}=\text{C}$ ), 1622 (s,  $\text{C}=\text{C}$ ), 1596 (s,  $\text{C}=\text{N}$ ).

<sup>1</sup>H-NMR (400.12 MHz, *d*<sub>6</sub>-DMSO):  $\delta$  = 7.90 (s, 2H,  $\text{N}=\text{CH}$ ), 7.54 (dd, 2H, <sup>3</sup>*J*<sub>HH</sub> = 8.13, <sup>4</sup>*J*<sub>HH</sub> = 1.26, *C*<sub>arom</sub>*H*) 7.11 (tt, 1H, <sup>3</sup>*J*<sub>HH</sub> = 7.34, <sup>4</sup>*J*<sub>HH</sub> = 1.36, *C*<sub>arom</sub>*H*), 7.11 – 7.03 (m, 6H, *C*<sub>arom</sub>*H*), 6.41 (dd, 2H, <sup>3</sup>*J*<sub>HH</sub> = 8.88, <sup>4</sup>*J*<sub>HH</sub> = 1.22, *C*<sub>arom</sub>*H*), 6.36 (td, 2H, <sup>3</sup>*J*<sub>HH</sub> = 7.61, <sup>4</sup>*J*<sub>HH</sub> = 1.11, *C*<sub>arom</sub>*H*), 3.77 (s, 4H, 2 × *CH*<sub>2</sub>), 3.49 (s, 2H, *CH*<sub>2</sub>) ppm.

<sup>13</sup>C NMR (101 MHz, *d*<sub>6</sub>-DMSO)  $\delta$  = 211.25 ( $\text{C}=\text{O}$ ), 165.51 (2 ×  $\text{C}=\text{N}$ ), 164.67, 139.26, 133.59, 132.66, 130.75, 127.53, 127.10, 122.50, 119.99, 112.87 (10 × *C*<sub>arom</sub>), 57.86, (2 × *CH*<sub>2</sub>) ppm.

**Co(salen)CH<sub>2</sub>CN.** Co(salen) (0.25 g) was partially dissolved in boiling acetonitrile/methanol (3:2 V/V, 25 mL) and the solution was allowed to stand for two days in darkness, during which the colour changed from red to brown. The solution was evaporated to almost dryness *in vacuo* and precipitated with n-hexane, which yielded a brown precipitate which was collected by filtration (0.16 g, 55.7 %). Single crystals suitable for X-ray diffraction were obtained by slow evaporation from a methanol/benzene solution of Co(salen)CH<sub>2</sub>CN, yielding [Co(salen)CH<sub>2</sub>CN]<sub>2</sub>·(C<sub>6</sub>H<sub>6</sub>).

IR (ATR-FT)  $\text{cm}^{-1}$ : 2204 (m,  $\nu(\text{C}\equiv\text{N})$ ), 1627 (s,  $\text{C}=\text{C}$ ), 1598 (s,  $\text{C}=\text{N}$ ).

<sup>1</sup>H-NMR (400.12 MHz, *d*<sub>6</sub>-DMSO):  $\delta$  = 8.05 (s, 2H,  $\text{N}=\text{CH}$ ), 7.19 (dd, 2H, <sup>3</sup>*J*<sub>HH</sub> = 7.64, <sup>4</sup>*J*<sub>HH</sub> = 1.64, *C*<sub>arom</sub>*H*) 7.13 (td, 2H, <sup>3</sup>*J*<sub>HH</sub> = 7.63, <sup>4</sup>*J*<sub>HH</sub> = 1.64, *C*<sub>arom</sub>*H*), 6.93 (d, 2H, <sup>3</sup>*J*<sub>HH</sub> = 8.36, *C*<sub>arom</sub>*H*), 6.43 (t, 2H, <sup>3</sup>*J*<sub>HH</sub> = 7.22, *C*<sub>arom</sub>*H*), 3.80 (m, 4H, 2 × *CH*<sub>2</sub>), 2.34 (s, 2H, *CH*<sub>2</sub>) ppm.

<sup>13</sup>C NMR (101 MHz, *d*<sub>6</sub>-DMSO)  $\delta$  = 165.93 (2 ×  $\text{C}=\text{N}$ ), 164.96, 134.11, 133.38 (3 × *C*<sub>arom</sub>), 129.79 ( $\text{C}\equiv\text{N}$ ), 122.45, 119.77, 113.45 (3 × *C*<sub>arom</sub>), 57.84 (2 × *CH*<sub>2</sub>) ppm.

**[Co(salen)(OCH<sub>2</sub>CF<sub>3</sub>)<sub>2</sub>·4 CF<sub>3</sub>CH<sub>2</sub>OH.** Co(salen) (0.25 g) was dissolved in boiling 2,2,2-trifluoroethanol (dry, 25 mL) and the solution was allowed to stand for one day with exposure to air, which yielded red needle crystals, suitable for X-ray diffraction, which were collected by filtration (0.33 g, 68.4 %).

$^1\text{H-NMR}$  (400.12 MHz,  $d_6$ -DMSO):  $\delta = 8.10$  (s, 2H, N=CH), 7.32 (d, 2H,  $^3J_{\text{HH}} = 7.0$  Hz,  $\text{C}_{\text{arom}}\text{H}$ ) 7.23 (m, 4H,  $\text{C}_{\text{arom}}\text{H}$ ), 6.93 (m, 2H,  $\text{C}_{\text{arom}}\text{H}$ ), 3.88 (m, 4H,  $2 \times \text{CH}_2$ ), 2.35 (q, 2H,  $^3J_{\text{HF}} = 10.7$  Hz,  $\text{CH}_2$ ) ppm.

$^{13}\text{C NMR}$  (101 MHz,  $d_6$ -DMSO)  $\delta = 166.62$  ( $2 \times \text{C}=\text{N}$ ), 165.16, 134.08, 133.43 ( $3 \times \text{C}_{\text{arom}}$ ), 125.19 (q,  $^2J_{\text{CF}} = 153.4$  Hz,  $1 \times \text{CF}_3$ ), 123.12 (q,  $^2J_{\text{CF}} = 156.4$  Hz,  $1 \times \text{CF}_3$ ) 122.09, 119.20, 113.18 ( $3 \times \text{C}_{\text{arom}}$ ), 62.32, (q,  $^3J_{\text{CF}} = 29.8$  Hz,  $\text{CH}_2$ ), 59.19 (q,  $^3J_{\text{CF}} = 33.3$  Hz,  $\text{CH}_2$ ), 57.96 ( $2 \times \text{CH}_2$ ) ppm.

$^{19}\text{F-NMR}$  (376 MHz,  $d_6$ -DMSO)  $\delta = -73.13$  (s,  $\text{CF}_3$ ),  $-75.22$  (s,  $\text{CF}_3$ ) ppm.

### Photolysis of Co(salen)CH<sub>2</sub>COCH<sub>3</sub>

Co(salen)(CH<sub>2</sub>COCH<sub>3</sub>)(MeOH) (3 mg, 7.85 μmol) was dissolved in 1 mL of d<sub>6</sub>-DMSO to which was added TEMPO (10 mg, 64 μmol). The solution was then irradiated for 48 h at ambient temperature, using the fume cupboard lamp as the source of irradiation. During that time the colour of the solution changed from brown-green to red.

<sup>1</sup>H-NMR (400.12 MHz, d<sub>6</sub>-DMSO): δ = 4.40 (s, 2H, O-CH<sub>2</sub>), 2.07 (s, 3H, CO-CH<sub>3</sub>), 1.43 – 1.25 (bm, 6H, 3 × CH<sub>2</sub>), 1.08 (s, 12H, 4 × CH<sub>3</sub>) ppm.

<sup>13</sup>C NMR (101 MHz, DMSO) δ = 206.01 (C=O), 82.62 (O-CH<sub>2</sub>), 59.07 (2 × C-(CH<sub>3</sub>)<sub>2</sub>), 33.20 (2 × CH<sub>2</sub>), 30.54 (4 × CH<sub>3</sub>), 19.62 (CO-CH<sub>3</sub>) ppm 16.25 (CH<sub>2</sub>) ppm.

ESI-MS (pos. mode, MeCN): found (calcd) *m/z* = 236.153 (236.16, [TEMPO-CH<sub>2</sub>COCH<sub>3</sub>Na]<sup>+</sup>, C<sub>12</sub>H<sub>23</sub>NNaO<sub>2</sub> 100%), 325.037 (325.04, [Co(salen)]<sup>+</sup>, C<sub>16</sub>H<sub>14</sub>CoN<sub>2</sub>O<sub>2</sub>, 100%).



## Figures

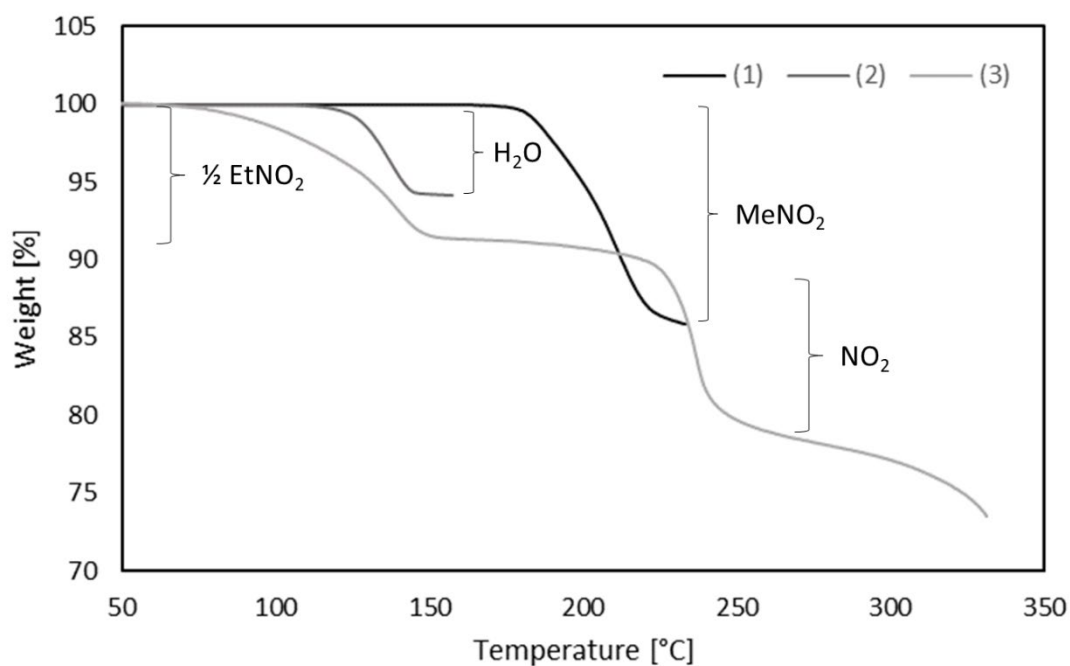

**Figure S1.** TGA curves of 1)  $[\text{Co}(\text{salen})(\text{CH}_2\text{NO}_2)]_2 \cdot (2 \text{ MeNO}_2)$ , 2)  $\text{Co}(\text{salen})(\text{NO}_2)(\text{H}_2\text{O})$  and 3)  $[\text{Co}(\text{salen})\text{NO}_2]_2 \cdot (\text{EtNO}_2)$ .

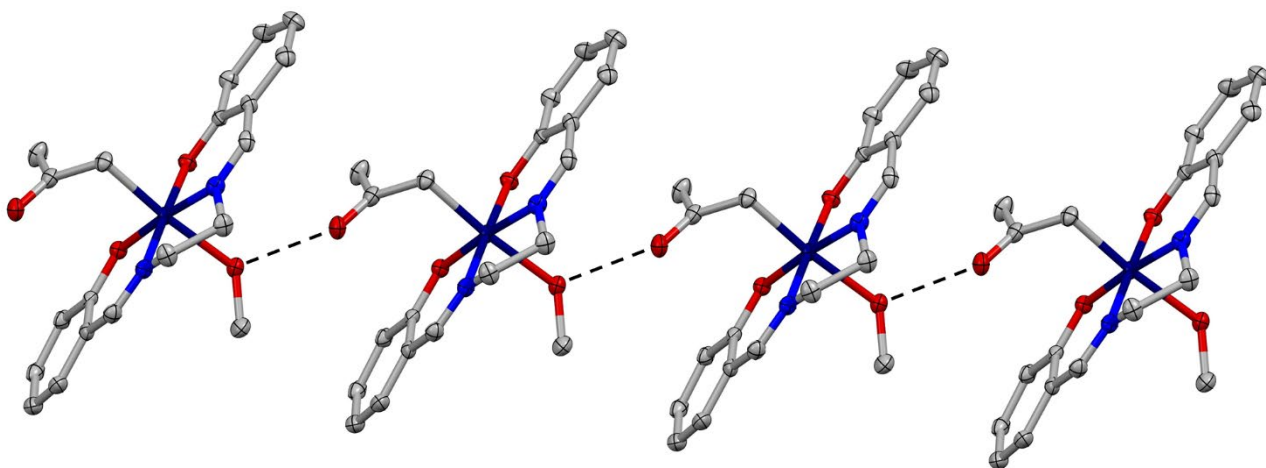

**Figure S2.** The hydrogen bonded 1D chain of  $\text{Co}(\text{salen})\text{CH}_2\text{COCH}_3(\text{MeOH})$  (**3**) parallel to the a-axis. Thermal ellipsoids are drawn at 50 % probability and hydrogen atoms are omitted for clarity. The intermolecular hydrogen bond is shown with dashed lines ( $\text{C}=\text{O} \cdots \text{H}-\text{O}$  2.70 Å).

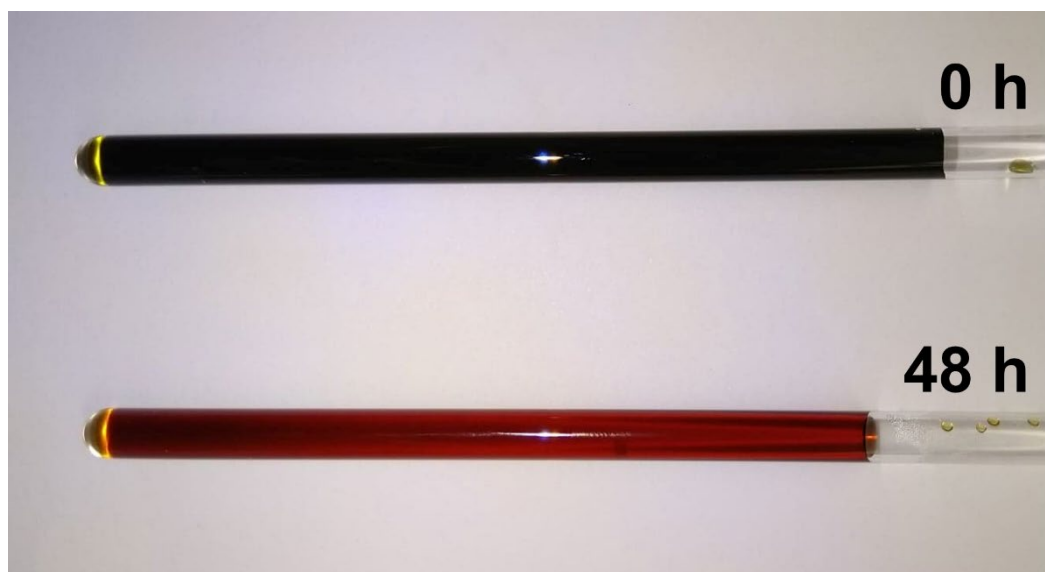

**Figure S3.** NMR tubes containing  $\text{Co}(\text{salen})\text{CH}_2\text{COCH}_3$  and TEMPO in  $d_6$ -DMSO under visible light irradiation at room temperature for 48 hours.

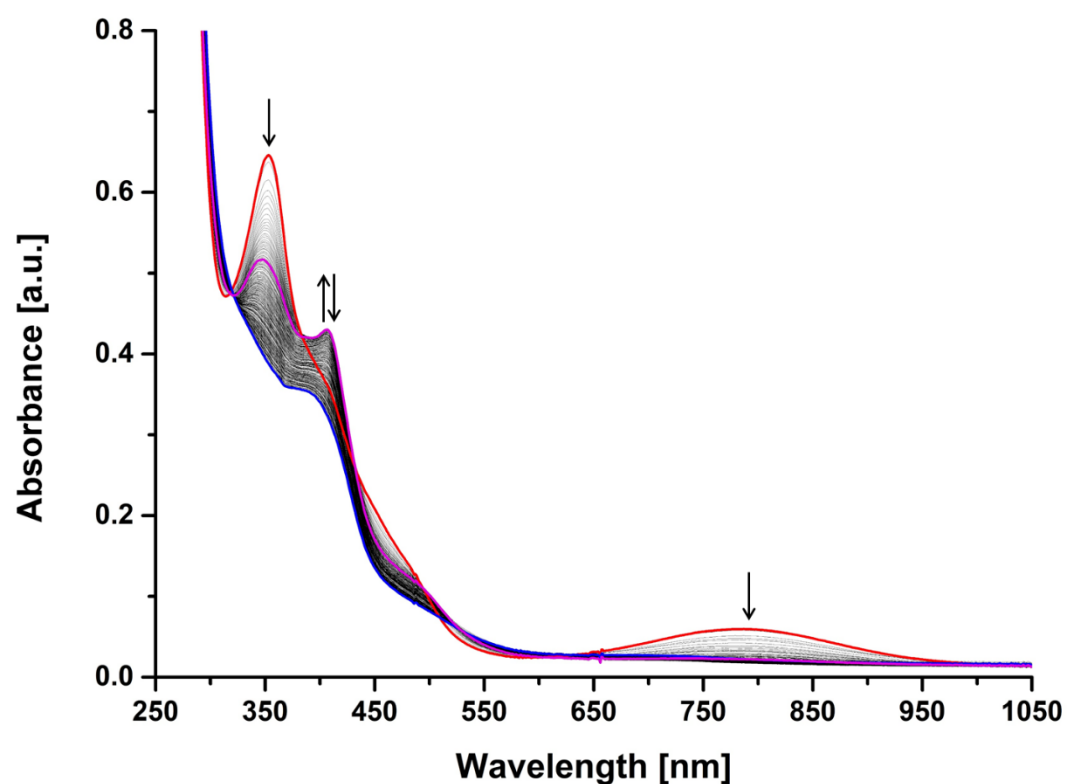

**Figure S4.** Time resolved UV-vis spectra of radical trapping reaction between  $\text{Co}(\text{salen})\text{CH}_2\text{COCH}_3$  (0.1 mM) and TEMPO (1 mM) in DCM by irradiation at 365 nm.

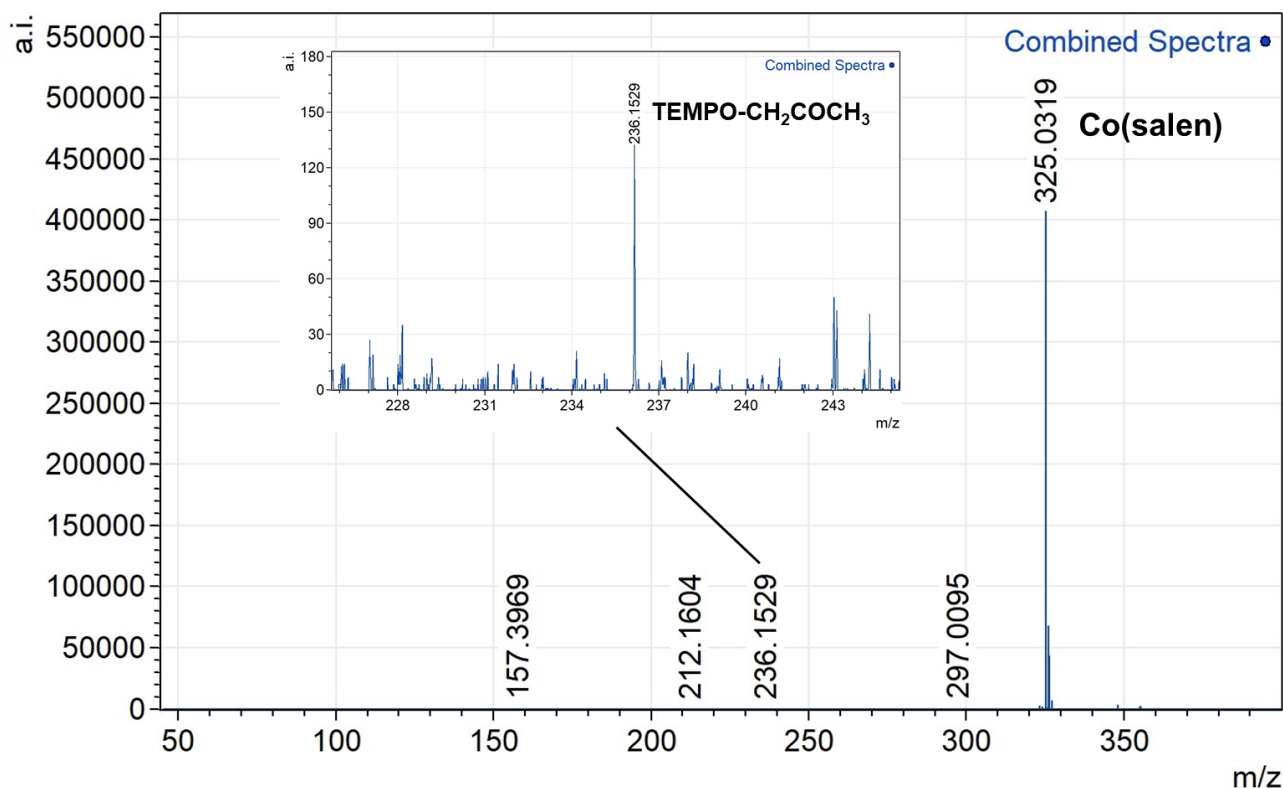

Figure S5. MS spectrum of the photoreaction between  $\text{Co(salen)CH}_2\text{COCH}_3$  and TEMPO.

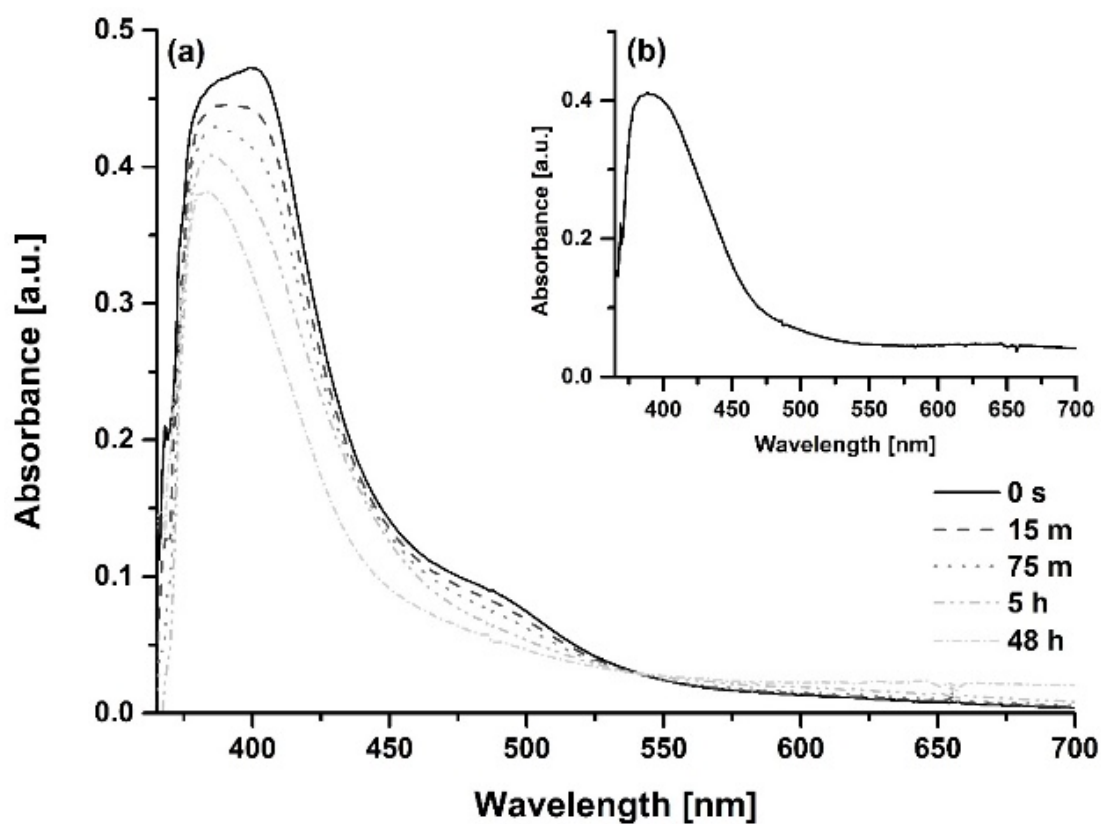

Figure S6. Time-resolved conversion of  $\text{Co(salen)}$  (0.1 mM) to  $\text{Co(salen)(CH}_2\text{NO}_2)$  upon its exposure in a degassed solution of  $\text{MeNO}_2$  to air

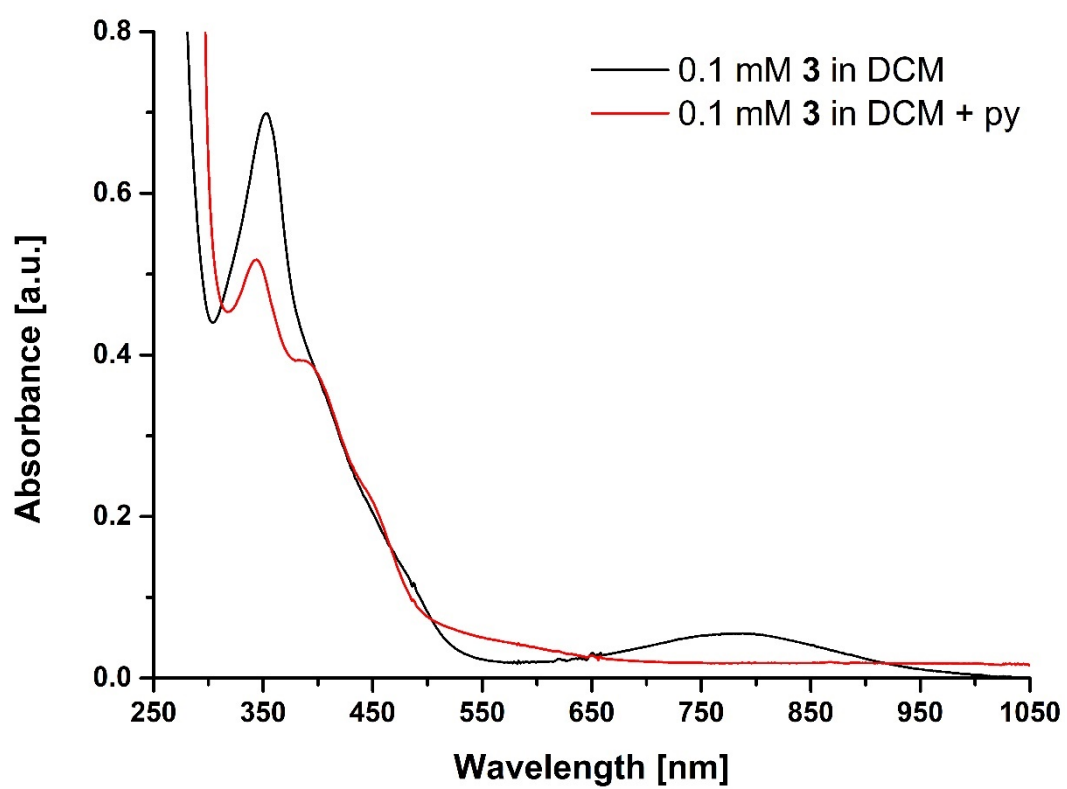

Figure S7. UV-vis spectra of  $\text{Co}(\text{salen})(\text{CH}_2\text{COCH}_3)$  in DCM before and after the addition of pyridine (py).

## Crystal data and extra images

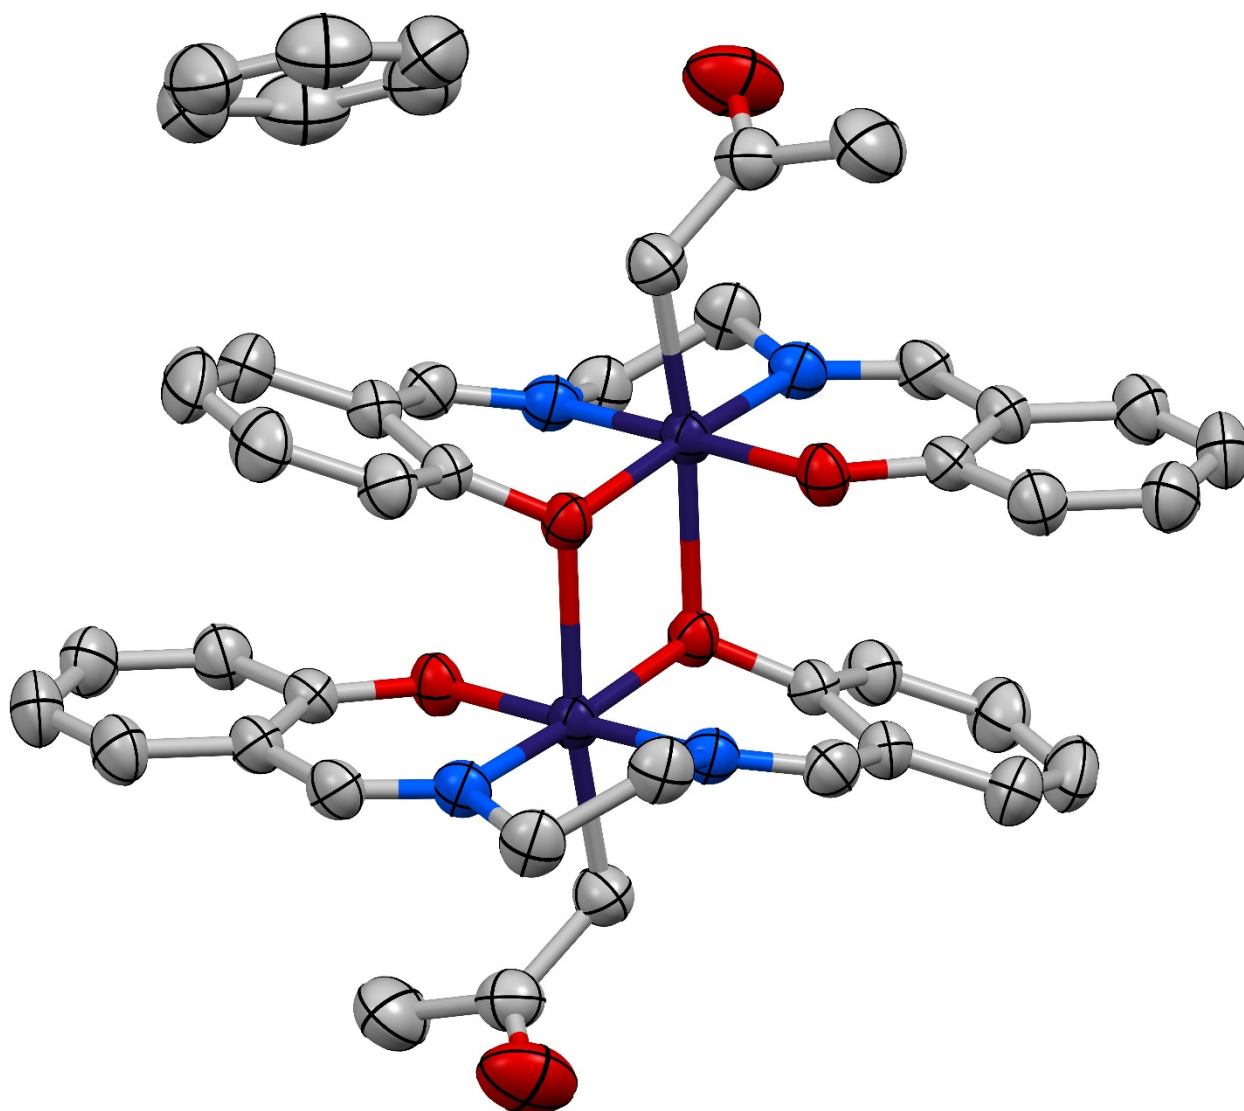

**Figure S9.** Crystal structure of [Co(salen)(CH<sub>2</sub>COCH<sub>3</sub>)]<sub>2</sub>·(C<sub>6</sub>H<sub>6</sub>). Thermal ellipsoids are drawn at 50 % probability and hydrogen atoms are omitted for clarity.

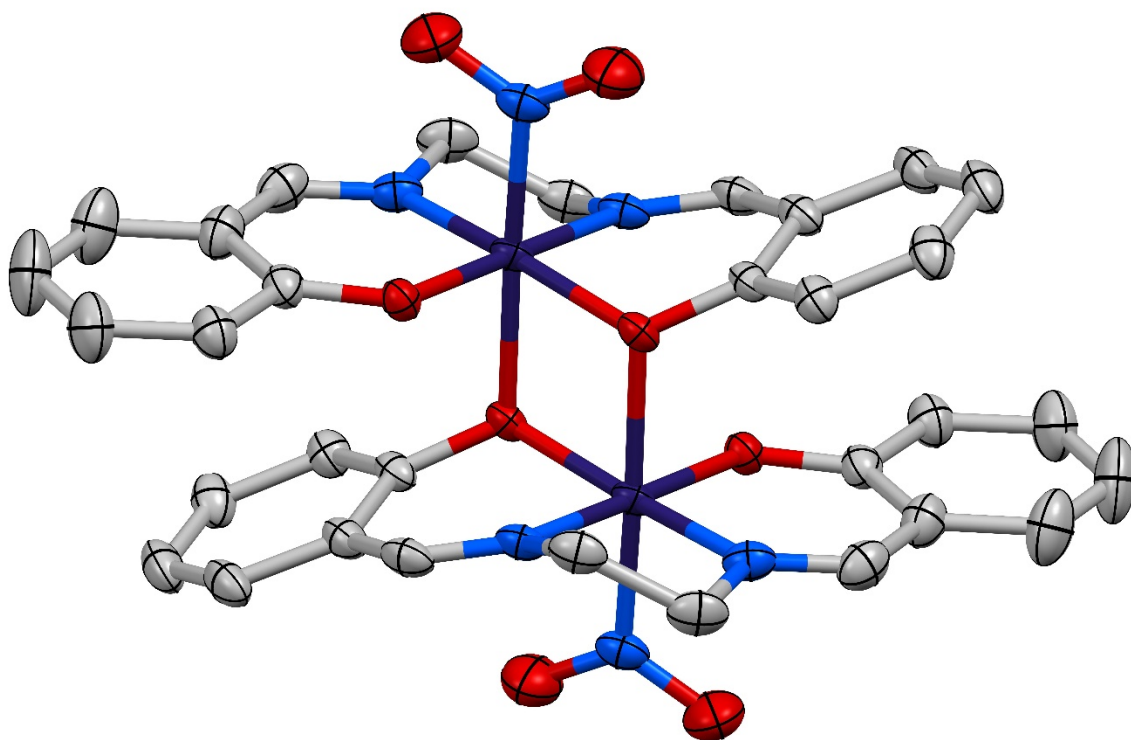

**Figure S10.** Crystal structure of [Co(salen)(NO<sub>2</sub>)<sub>2</sub>](EtNO<sub>2</sub>). Thermal ellipsoids are drawn at 50 % probability and protons are omitted for clarity. EtNO<sub>2</sub> removed with SQUEEZE.

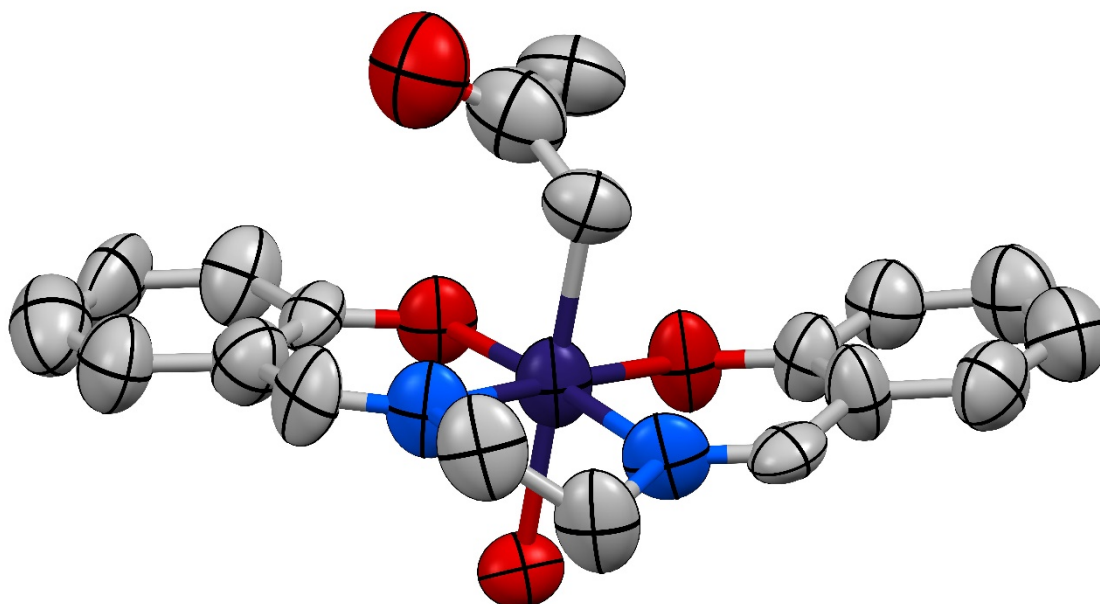

**Figure S11.** Crystal structure of Co(salen)(CH<sub>2</sub>COCH<sub>3</sub>)(H<sub>2</sub>O). Thermal ellipsoids are drawn at 50 % probability and hydrogen atoms are omitted for clarity.

**Table S1.** Crystallographic data for [Co(salen)(CH<sub>2</sub>NO<sub>2</sub>)<sub>2</sub>·(2 MeNO<sub>2</sub>), Co(salen)(CH<sub>2</sub>COCH<sub>3</sub>)(MeOH) and [Co(salen)(CH<sub>2</sub>COPh)]<sub>2</sub>.

| Compound                                     | [Co(salen)(CH <sub>2</sub> NO <sub>2</sub> ) <sub>2</sub> ·(2 MeNO <sub>2</sub> ) | Co(salen)(CH <sub>2</sub> COCH <sub>3</sub> )(MeOH)             | [Co(salen)(CH <sub>2</sub> COPh)] <sub>2</sub>                  |
|----------------------------------------------|-----------------------------------------------------------------------------------|-----------------------------------------------------------------|-----------------------------------------------------------------|
| CCDC                                         | 2045579                                                                           | 2045583                                                         | 2045578                                                         |
| Empirical formula                            | C <sub>18</sub> H <sub>19</sub> CoN <sub>4</sub> O <sub>6</sub>                   | C <sub>20</sub> H <sub>23</sub> CoN <sub>2</sub> O <sub>4</sub> | C <sub>24</sub> H <sub>21</sub> CoN <sub>2</sub> O <sub>3</sub> |
| Formula weight                               | 446.30                                                                            | 414.33                                                          | 444.36                                                          |
| Temperature [K]                              | 100(2)                                                                            | 100(2)                                                          | 100(2)                                                          |
| Crystal system                               | monoclinic                                                                        | monoclinic                                                      | monoclinic                                                      |
| Space group                                  | P2 <sub>1</sub> /n                                                                | P2 <sub>1</sub> /c                                              | P2 <sub>1</sub> /c                                              |
| a [Å]                                        | 10.04280(10)                                                                      | 7.5674(2)                                                       | 10.9070(2)                                                      |
| b [Å]                                        | 13.78740(10)                                                                      | 19.9473(5)                                                      | 14.9544(2)                                                      |
| c [Å]                                        | 13.33000(10)                                                                      | 12.5497(3)                                                      | 13.0565(2)                                                      |
| α [°]                                        | 90                                                                                | 90                                                              | 90                                                              |
| β [°]                                        | 97.7900(10)                                                                       | 99.379(3)                                                       | 111.878(2)                                                      |
| γ [°]                                        | 90                                                                                | 90                                                              | 90                                                              |
| Volume/Å <sup>3</sup>                        | 1828.69(3)                                                                        | 1869.04(8)                                                      | 1976.24(6)                                                      |
| Z                                            | 4                                                                                 | 4                                                               | 4                                                               |
| ρ <sub>calc</sub> [g/cm <sup>3</sup> ]       | 1.621                                                                             | 1.472                                                           | 1.493                                                           |
| μ [mm <sup>-1</sup> ]                        | 7.775                                                                             | 7.442                                                           | 7.050                                                           |
| F(000)                                       | 920.0                                                                             | 864.0                                                           | 920.0                                                           |
| Crystal size [mm <sup>3</sup> ]              | 0.091 × 0.049 × 0.042                                                             | 0.082 × 0.070 × 0.018                                           | 0.065 × 0.031 × 0.022                                           |
| Radiation                                    | CuKα (λ = 1.54184)                                                                | CuKα (λ = 1.54184)                                              | CuKα (λ = 1.54184)                                              |
| 2θ range for data collection [°]             | 9.272 to 149.594                                                                  | 8.404 to 149.154                                                | 8.736 to 149.252                                                |
| Index ranges                                 | -12 ≤ h ≤ 12<br>-17 ≤ k ≤ 17<br>-16 ≤ l ≤ 16                                      | -7 ≤ h ≤ 9<br>-22 ≤ k ≤ 24<br>-15 ≤ l ≤ 12                      | -13 ≤ h ≤ 13<br>-18 ≤ k ≤ 18<br>-13 ≤ l ≤ 15                    |
| Reflections collected                        | 40063                                                                             | 7723                                                            | 17982                                                           |
| Independent reflections                      | 3716                                                                              | 7723                                                            | 3994                                                            |
| R <sub>int</sub> , R <sub>sigma</sub>        | 0.0323, 0.0134                                                                    | 0.0428, 0.0404                                                  | 0.0231, 0.0174                                                  |
| Data/restraints/parameters                   | 3716/0/263                                                                        | 7723/0/251                                                      | 3994/0/271                                                      |
| Goodness-of-fit on F <sup>2</sup>            | 1.051                                                                             | 1.048                                                           | 1.045                                                           |
| Final R indexes [I ≥ 2σ (I)]                 | R <sub>1</sub> = 0.0330, wR <sub>2</sub> = 0.0934                                 | R <sub>1</sub> = 0.0420, wR <sub>2</sub> = 0.1189               | R <sub>1</sub> = 0.0277, wR <sub>2</sub> = 0.0672               |
| Final R indexes [all data]                   | R <sub>1</sub> = 0.0340, wR <sub>2</sub> = 0.0943                                 | R <sub>1</sub> = 0.0541, wR <sub>2</sub> = 0.1220               | R <sub>1</sub> = 0.0316, wR <sub>2</sub> = 0.0695               |
| Largest diff. peak/hole [e Å <sup>-3</sup> ] | 0.90/-0.41                                                                        | 0.94/-0.32                                                      | 0.36/-0.34                                                      |

**Table S2.** Crystallographic data for [Co(salen)(CH<sub>2</sub>CN)]<sub>2</sub> · (C<sub>6</sub>H<sub>6</sub>), Co(salen)(NO<sub>2</sub>)(H<sub>2</sub>O) and [Co(salen)(OCH<sub>2</sub>CF<sub>3</sub>)]<sub>2</sub> · (4 CF<sub>3</sub>CH<sub>2</sub>OH).

| Compound                                     | [Co(salen)(CH <sub>2</sub> CN)] <sub>2</sub> · (C <sub>6</sub> H <sub>6</sub> ) | Co(salen)(NO <sub>2</sub> )(H <sub>2</sub> O)                  | [Co(salen)(OCH <sub>2</sub> CF <sub>3</sub> )] <sub>2</sub> · (4 CF <sub>3</sub> CH <sub>2</sub> OH) |
|----------------------------------------------|---------------------------------------------------------------------------------|----------------------------------------------------------------|------------------------------------------------------------------------------------------------------|
| CCDC                                         | 2045576                                                                         | 2045584                                                        | 2045581                                                                                              |
| Empirical formula                            | C <sub>21</sub> H <sub>19</sub> CoN <sub>3</sub> O <sub>2</sub>                 | C <sub>16</sub> H <sub>6</sub> CoN <sub>3</sub> O <sub>5</sub> | C <sub>22</sub> H <sub>22</sub> N <sub>2</sub> O <sub>5</sub> F <sub>6</sub> Co                      |
| Formula weight                               | 404.32                                                                          | 389.25                                                         | 624.34                                                                                               |
| Temperature [K]                              | 100(2)                                                                          | 100(2)                                                         | 100(1)                                                                                               |
| Crystal system                               | monoclinic                                                                      | monoclinic                                                     | triclinic                                                                                            |
| Space group                                  | P2 <sub>1</sub> /n                                                              | P2 <sub>1</sub> /n                                             | P-1                                                                                                  |
| a [Å]                                        | 11.0129(2)                                                                      | 13.7674(9)                                                     | 9.3662(2)                                                                                            |
| b [Å]                                        | 12.4615(2)                                                                      | 6.5594(3)                                                      | 11.9220(3)                                                                                           |
| c [Å]                                        | 13.5740(3)                                                                      | 17.6429(10)                                                    | 13.0281(2)                                                                                           |
| α [°]                                        | 90                                                                              | 90                                                             | 105.961(2)                                                                                           |
| β [°]                                        | 104.732(2)                                                                      | 93.879(6)                                                      | 102.9240(10)                                                                                         |
| γ [°]                                        | 90                                                                              | 90                                                             | 109.030(2)                                                                                           |
| Volume/Å <sup>3</sup>                        | 1801.62(6)                                                                      | 1589.61(16)                                                    | 1241.20(5)                                                                                           |
| Z                                            | 4                                                                               | 4                                                              | 2                                                                                                    |
| ρ <sub>calc</sub> [g/cm <sup>3</sup> ]       | 1.491                                                                           | 1.626                                                          | 1.671                                                                                                |
| μ [mm <sup>-1</sup> ]                        | 7.644                                                                           | 8.779                                                          | 6.404                                                                                                |
| F(000)                                       | 836.0                                                                           | 800.0                                                          | 632.0                                                                                                |
| Crystal size [mm <sup>3</sup> ]              | 0.159 × 0.019 × 0.013                                                           | 0.077 × 0.036 × 0.027                                          | 0.152 × 0.032 × 0.022                                                                                |
| Radiation                                    | CuKα (λ = 1.54184)                                                              | CuKα (λ = 1.54184)                                             | Cu Kα (λ = 1.54184)                                                                                  |
| 2θ range for data collection [°]             | 9.268 to 148.458                                                                | 7.892 to 151.804                                               | 7.518 to 148.912                                                                                     |
| Index ranges                                 | -13 ≤ h ≤ 12<br>-15 ≤ k ≤ 14<br>-12 ≤ l ≤ 16                                    | -17 ≤ h ≤ 17<br>-7 ≤ k ≤ 8<br>-21 ≤ l ≤ 22                     | -11 ≤ h ≤ 11<br>-14 ≤ k ≤ 14<br>-16 ≤ l ≤ 16                                                         |
| Reflections collected                        | 9583                                                                            | 33718                                                          | 44153                                                                                                |
| Independent reflections                      | 3544                                                                            | 3241                                                           | 4979                                                                                                 |
| R <sub>int</sub> , R <sub>sigma</sub>        | 0.0283, 0.0321                                                                  | 0.0754, 0.0242                                                 | 0.0596, 0.0326                                                                                       |
| Data/restraints/parameters                   | 3544/0/244                                                                      | 3241/488/259                                                   | 4979/0/356                                                                                           |
| Goodness-of-fit on F <sup>2</sup>            | 1.050                                                                           | 1.056                                                          | 1.036                                                                                                |
| Final R indexes [I ≥ 2σ (I)]                 | R <sub>1</sub> = 0.0302, wR <sub>2</sub> = 0.0721                               | R <sub>1</sub> = 0.0701, wR <sub>2</sub> = 0.1842              | R <sub>1</sub> = 0.0327, wR <sub>2</sub> = 0.0826                                                    |
| Final R indexes [all data]                   | R <sub>1</sub> = 0.0375, wR <sub>2</sub> = 0.0762                               | R <sub>1</sub> = 0.0749, wR <sub>2</sub> = 0.1923              | R <sub>1</sub> = 0.0374, wR <sub>2</sub> = 0.0849                                                    |
| Largest diff. peak/hole [e Å <sup>-3</sup> ] | 0.29/-0.23                                                                      | 0.90/-0.26                                                     | 0.29/-0.35                                                                                           |



**Table S3.** Crystallographic data for [Co(salen)(CH<sub>2</sub>COCH<sub>3</sub>)<sub>2</sub> · (C<sub>6</sub>H<sub>6</sub>), [Co(salen)NO<sub>2</sub>]<sub>2</sub> · (½ CH<sub>3</sub>CH<sub>2</sub>NO<sub>2</sub>) and Co(salen)(CH<sub>2</sub>COCH<sub>3</sub>)(H<sub>2</sub>O).

| <b>Compound</b>                              | <b>[Co(salen)(CH<sub>2</sub>COCH<sub>3</sub>)<sub>2</sub> · (C<sub>6</sub>H<sub>6</sub>)</b> | <b>[Co(salen)NO<sub>2</sub>]<sub>2</sub> · (½ CH<sub>3</sub>CH<sub>2</sub>NO<sub>2</sub>)</b> | <b>Co(salen)(CH<sub>2</sub>COCH<sub>3</sub>)(H<sub>2</sub>O)</b> |
|----------------------------------------------|----------------------------------------------------------------------------------------------|-----------------------------------------------------------------------------------------------|------------------------------------------------------------------|
| CCDC                                         | 2045577                                                                                      | 2045580                                                                                       | 2045582                                                          |
| Empirical formula                            | C <sub>22</sub> H <sub>22</sub> N <sub>2</sub> O <sub>3</sub> Co                             | C <sub>16</sub> CoH <sub>14</sub> N <sub>3</sub> O <sub>4</sub>                               | C <sub>16</sub> H <sub>21</sub> N <sub>2</sub> O <sub>4</sub> Co |
| Formula weight                               | 421.34                                                                                       | 371.23                                                                                        | 400.31                                                           |
| Temperature [K]                              | 293(5)                                                                                       | 293(2)                                                                                        | 293(2)                                                           |
| Crystal system                               | triclinic                                                                                    | triclinic                                                                                     | triclinic                                                        |
| Space group                                  | P-1                                                                                          | P-1                                                                                           | P-1                                                              |
| a [Å]                                        | 7.5754(2)                                                                                    | 7.7899(2)                                                                                     | 9.1430(8)                                                        |
| b [Å]                                        | 11.5841(5)                                                                                   | 8.7278(2)                                                                                     | 9.8383(8)                                                        |
| c [Å]                                        | 11.8530(4)                                                                                   | 13.7362(3)                                                                                    | 11.1689(7)                                                       |
| α [°]                                        | 110.095(3)                                                                                   | 72.008(2)                                                                                     | 115.062(7)                                                       |
| β [°]                                        | 103.433(2)                                                                                   | 74.808(2)                                                                                     | 100.862(7)                                                       |
| γ [°]                                        | 94.087(3)                                                                                    | 79.890(2)                                                                                     | 93.188(8)                                                        |
| Volume/Å <sup>3</sup>                        | 937.02(6)                                                                                    | 852.63(4)                                                                                     | 883.35(13)                                                       |
| Z                                            | 2                                                                                            | 2                                                                                             | 2                                                                |
| ρ <sub>calc</sub> [g/cm <sup>3</sup> ]       | 1.493                                                                                        | 1.446                                                                                         | 1.505                                                            |
| μ [mm <sup>-1</sup> ]                        | 7.396                                                                                        | 8.112                                                                                         | 7.853                                                            |
| F(000)                                       | 438.0                                                                                        | 380.0                                                                                         | 416.0                                                            |
| Crystal size [mm <sup>3</sup> ]              | 0.119 × 0.105 × 0.020                                                                        | 0.148 × 0.041 × 0.028                                                                         | 0.054 × 0.019 × 0.012                                            |
| Radiation                                    | CuKα (λ = 1.54184)                                                                           | CuKα (λ = 1.54184)                                                                            | CuKα (λ = 1.54184)                                               |
| 2θ range for data collection [°]             | 8.24 to 149.014                                                                              | 6.94 to 152.224                                                                               | 8.992 to 117.854                                                 |
| Index ranges                                 | -9 ≤ h ≤ 9<br>-13 ≤ k ≤ 14<br>-14 ≤ l ≤ 14                                                   | -9 ≤ h ≤ 9<br>-10 ≤ k ≤ 10<br>-17 ≤ l ≤ 17                                                    | -7 ≤ h ≤ 10, -10 ≤ k ≤ 10, -12 ≤ l ≤ 12                          |
| Reflections collected                        | 20763                                                                                        | 30176                                                                                         | 6165                                                             |
| Independent reflections                      | 3761                                                                                         | 3481                                                                                          | 2522                                                             |
| R <sub>int</sub> , R <sub>sigma</sub>        | 0.0244, 0.0151                                                                               | 0.0447, 0.0229                                                                                | 0.1677, 0.1747                                                   |
| Data/restraints/parameters                   | 3761/0/254                                                                                   | 3481/0/217                                                                                    | 2522/4/245                                                       |
| Goodness-of-fit on F <sup>2</sup>            | 1.024                                                                                        | 1.058                                                                                         | 1.013                                                            |
| Final R indexes [I ≥ 2σ(I)]                  | R <sub>1</sub> = 0.0275, wR <sub>2</sub> = 0.0740                                            | R <sub>1</sub> = 0.0397, wR <sub>2</sub> = 0.1056                                             | R <sub>1</sub> = 0.0993, wR <sub>2</sub> = 0.2502                |
| Final R indexes [all data]                   | R <sub>1</sub> = 0.0305, wR <sub>2</sub> = 0.0762                                            | R <sub>1</sub> = 0.0418, wR <sub>2</sub> = 0.1073                                             | R <sub>1</sub> = 0.1840, wR <sub>2</sub> = 0.3481                |
| Largest diff. peak/hole [e Å <sup>-3</sup> ] | 0.21/-0.25                                                                                   | 0.60/-0.45                                                                                    | 0.53/-0.82                                                       |

## NMR spectra

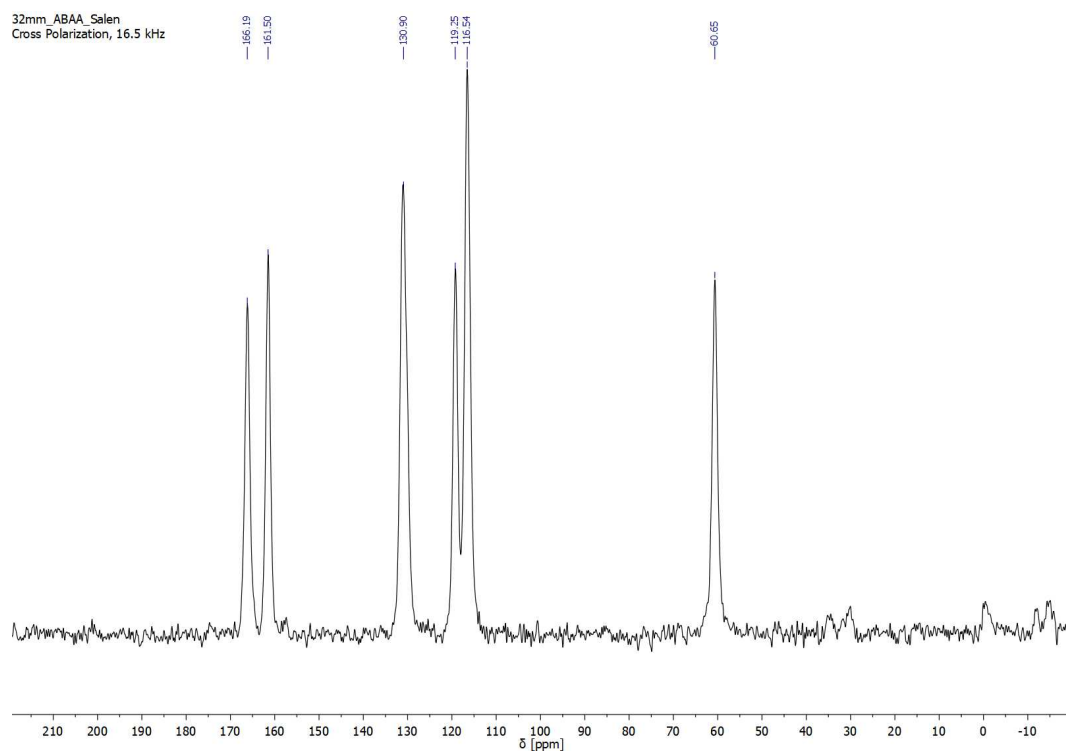

Figure S12.  $^{13}\text{C}$  CPMAS NMR of  $\text{H}_2\text{salen}$ .

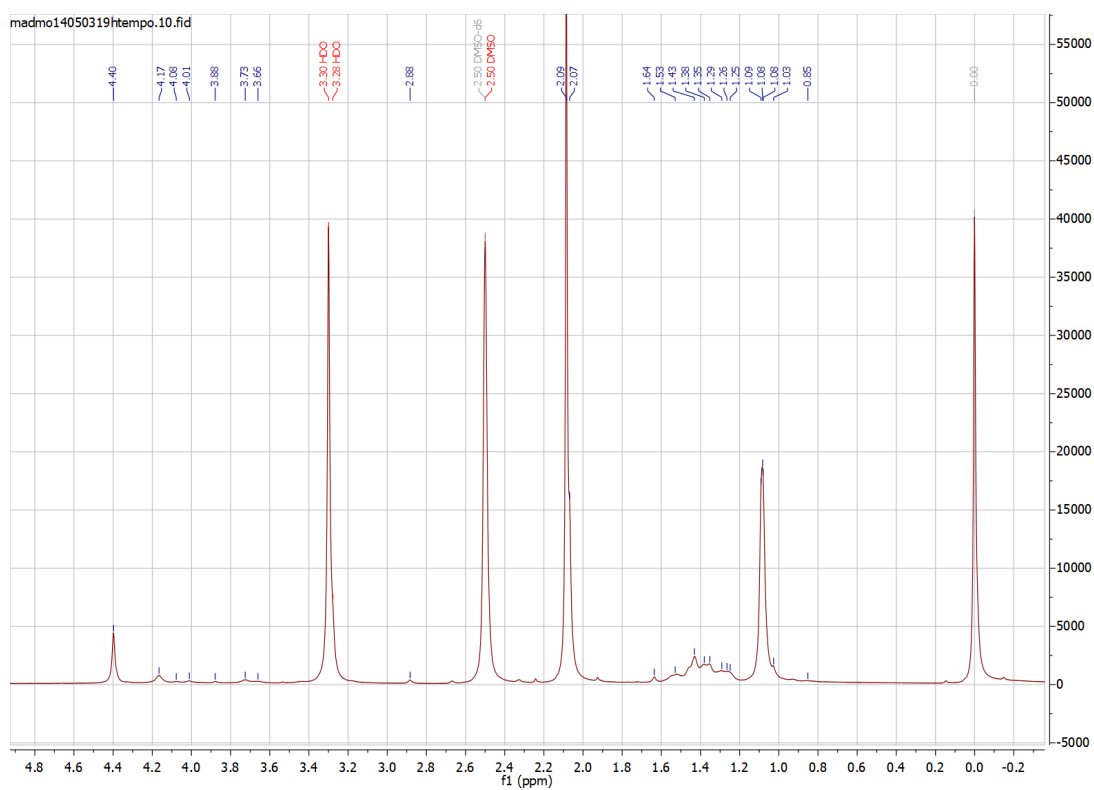

Figure S13.  $^1\text{H}$  NMR spectrum of  $\text{Co}(\text{salen})\text{CH}_2\text{COCH}_3$  and TEMPO in  $d_6$ -DMSO under visible light irradiation at room temperature for 48 hours.

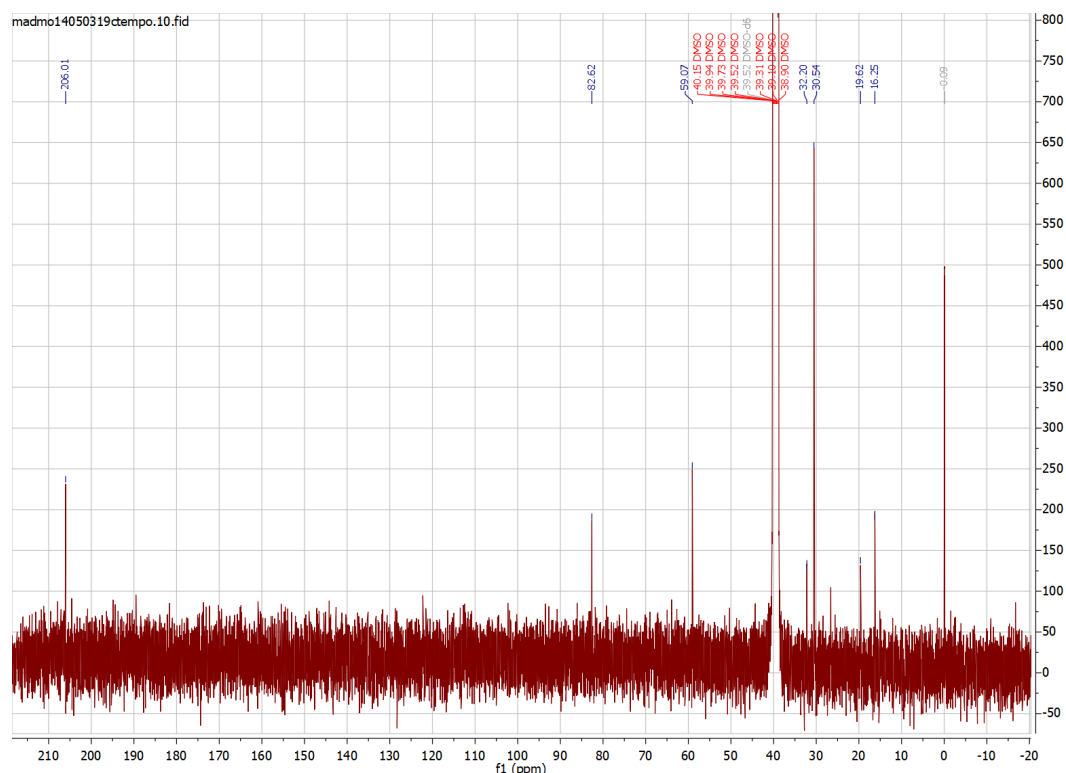

**Figure S14.**  $^{13}\text{C}$  NMR spectrum of  $\text{Co}(\text{salen})\text{CH}_2\text{COCH}_3$  and TEMPO in  $d_6$ -DMSO under visible light irradiation at room temperature for 48 hours.

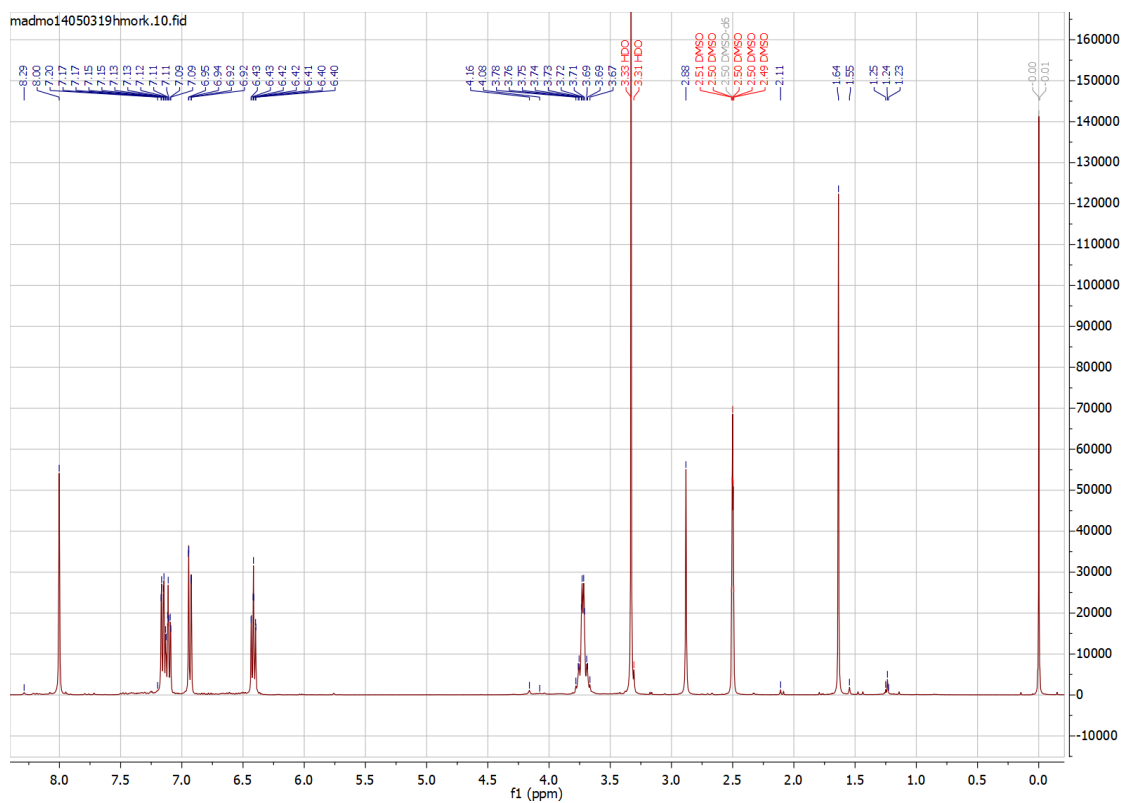

**Figure S15.**  $^1\text{H}$  NMR spectrum of  $\text{Co}(\text{salen})\text{CH}_2\text{COCH}_3$  in  $d_6$ -DMSO.

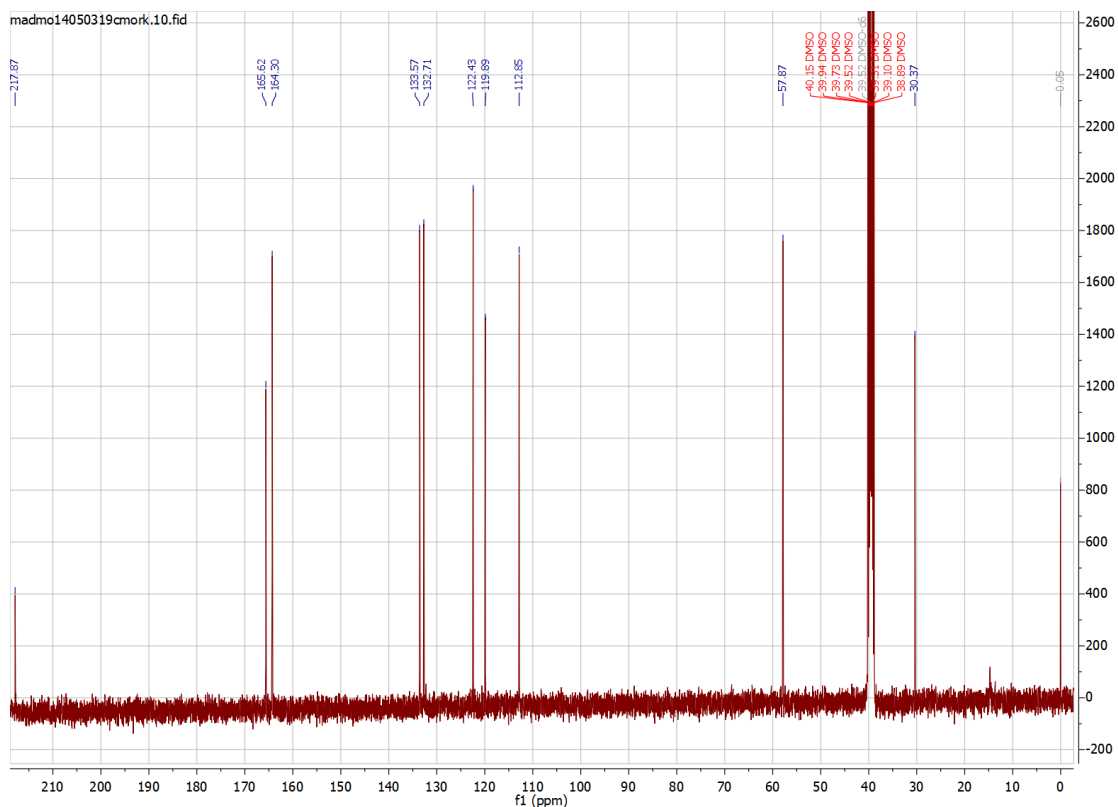

Figure S16.  $^{13}\text{C}$  NMR spectrum of  $\text{Co}(\text{salen})\text{CH}_2\text{COCH}_3$  in  $d_6$ -DMSO.

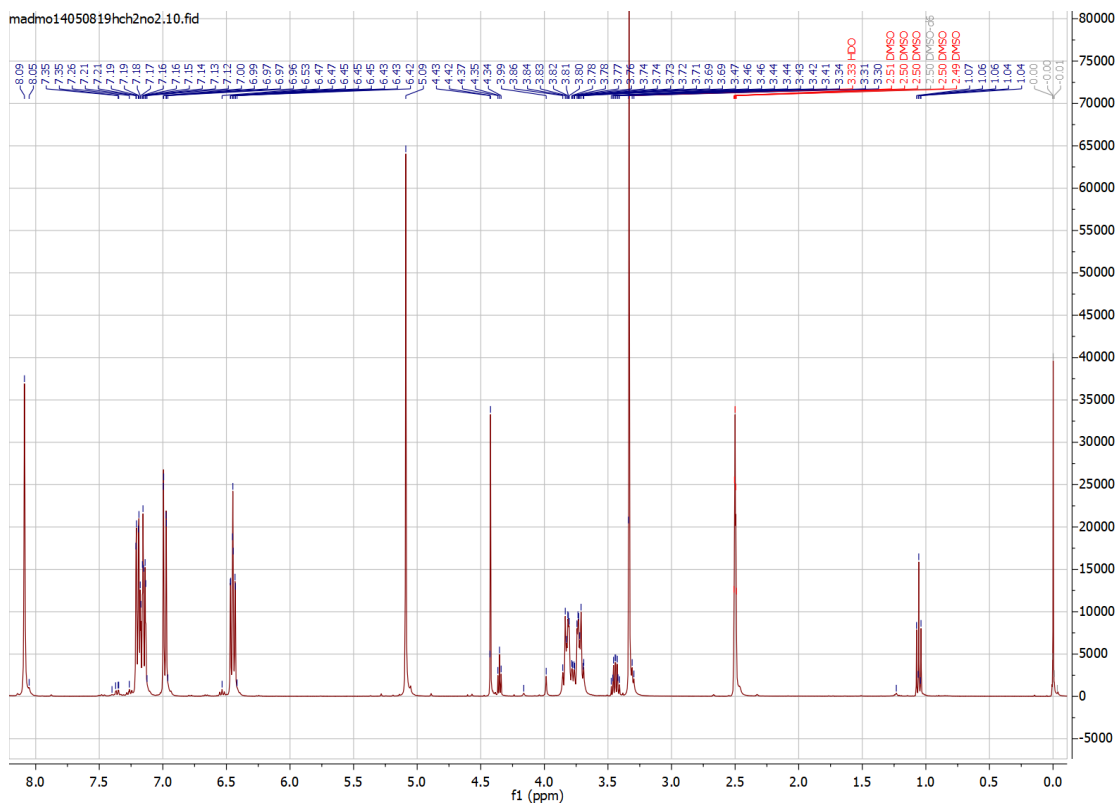

Figure S17.  $^1\text{H}$  NMR spectrum of  $\text{Co}(\text{salen})\text{CH}_2\text{NO}_2$  in  $d_6$ -DMSO.

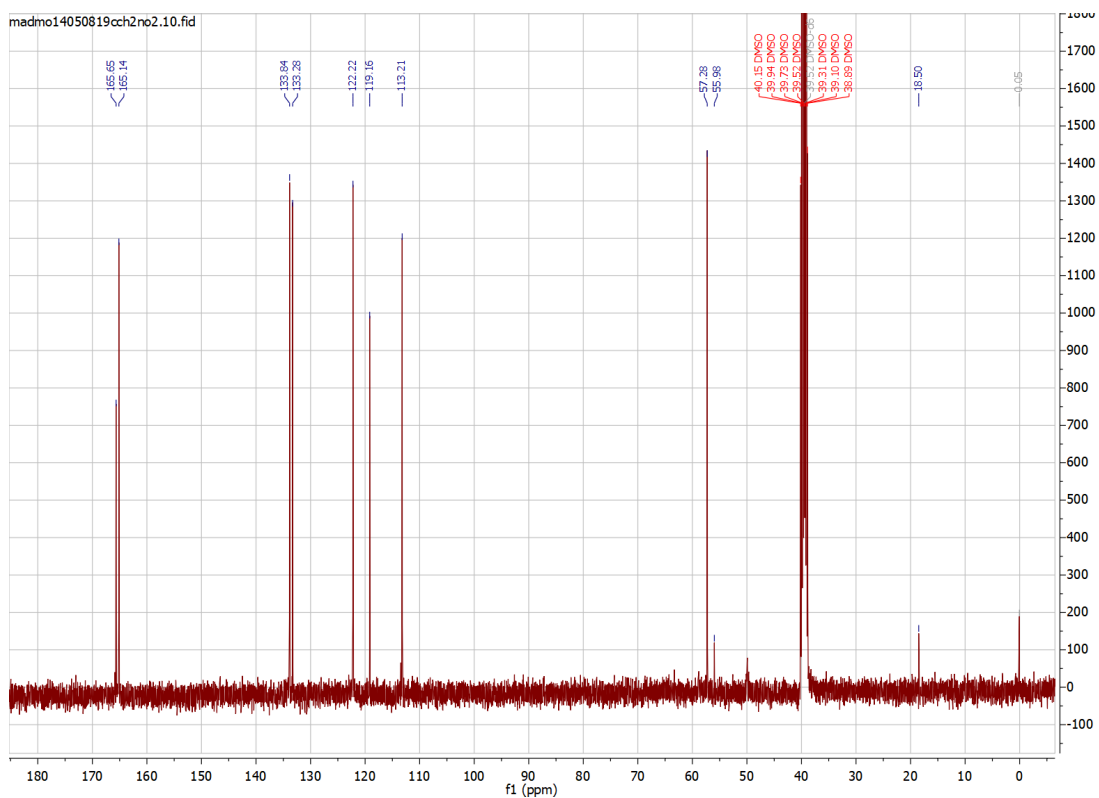

Figure S18.  $^{13}\text{C}$  NMR spectrum of  $\text{Co}(\text{salen})\text{CH}_2\text{NO}_2$  in  $d_6$ -DMSO.

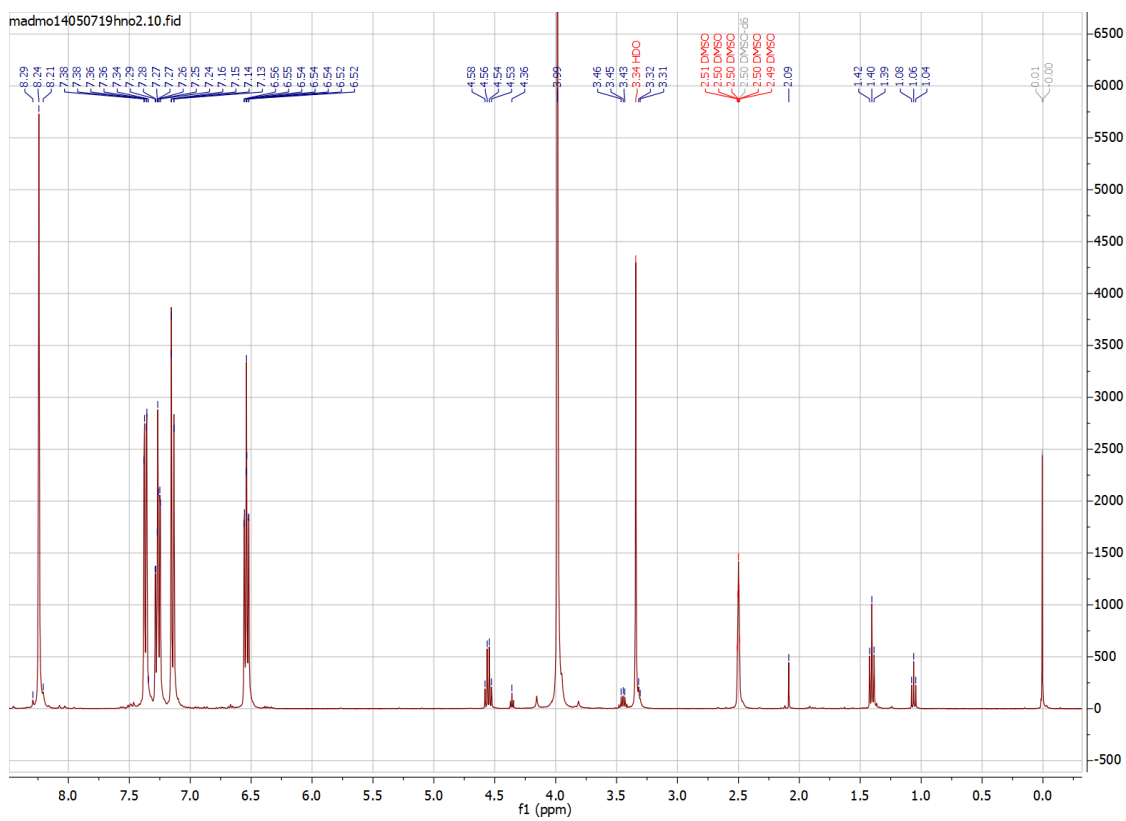

Figure S19.  $^1\text{H}$  NMR spectrum of  $\text{Co}(\text{salen})\text{NO}_2$  in  $d_6$ -DMSO.

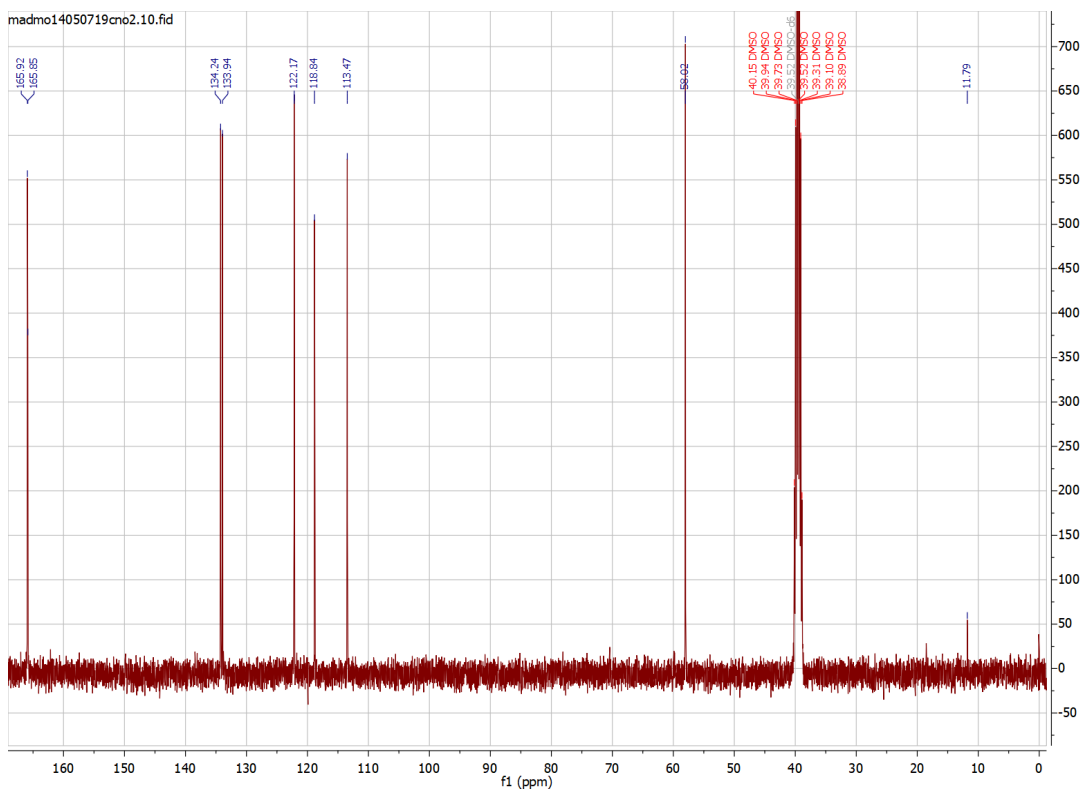

Figure S20.  $^{13}\text{C}$  NMR spectrum of  $\text{Co}(\text{salen})\text{NO}_2$  in  $d_6$ -DMSO.

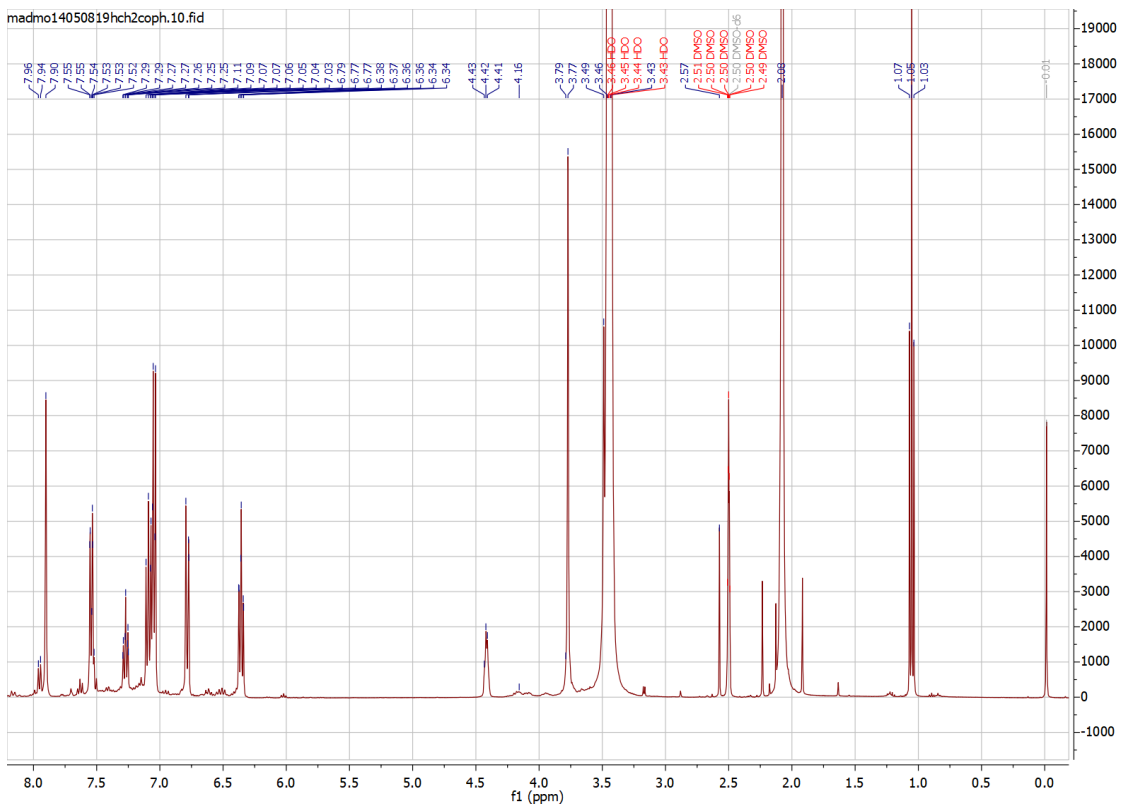

Figure S21.  $^1\text{H}$  NMR spectrum of  $\text{Co}(\text{salen})\text{CH}_2\text{COPh}$  in  $d_6$ -DMSO.

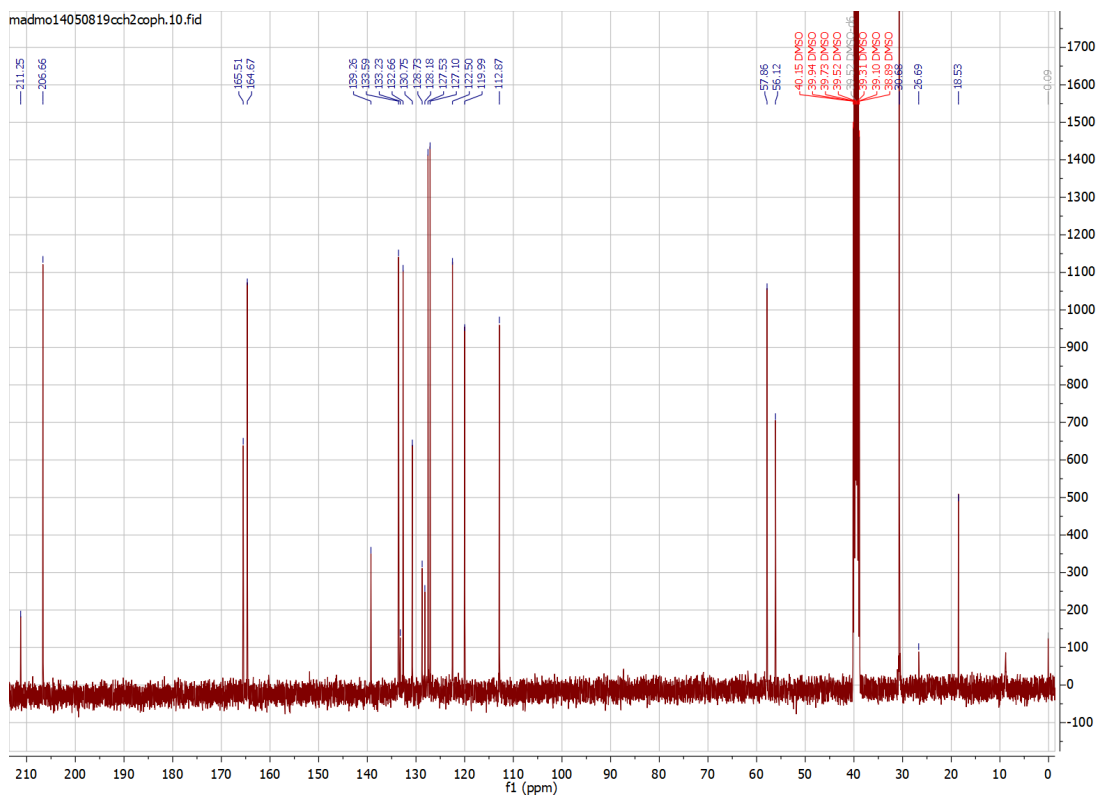

Figure S22.  $^{13}\text{C}$  NMR spectrum of  $\text{Co}(\text{salen})\text{CH}_2\text{COPh}$  in  $d_6$ -DMSO.

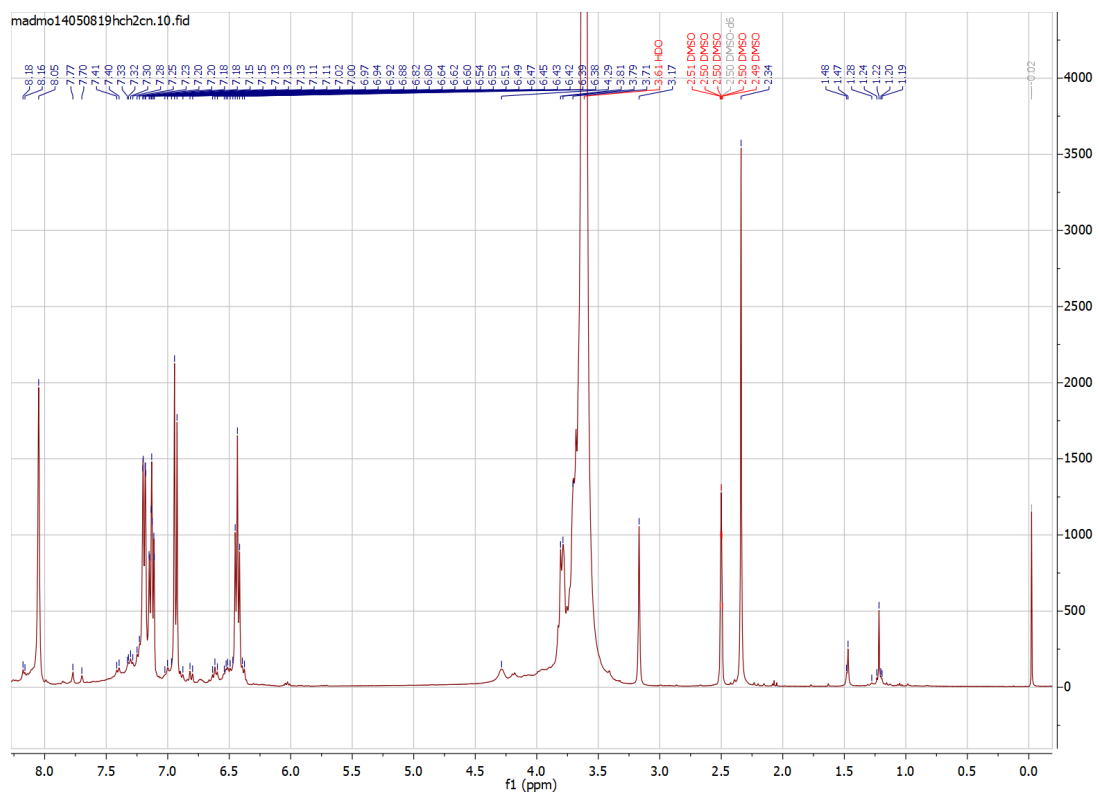

Figure S33.  $^1\text{H}$  NMR spectrum of  $\text{Co}(\text{salen})\text{CH}_2\text{CN}$  in  $d_6$ -DMSO.

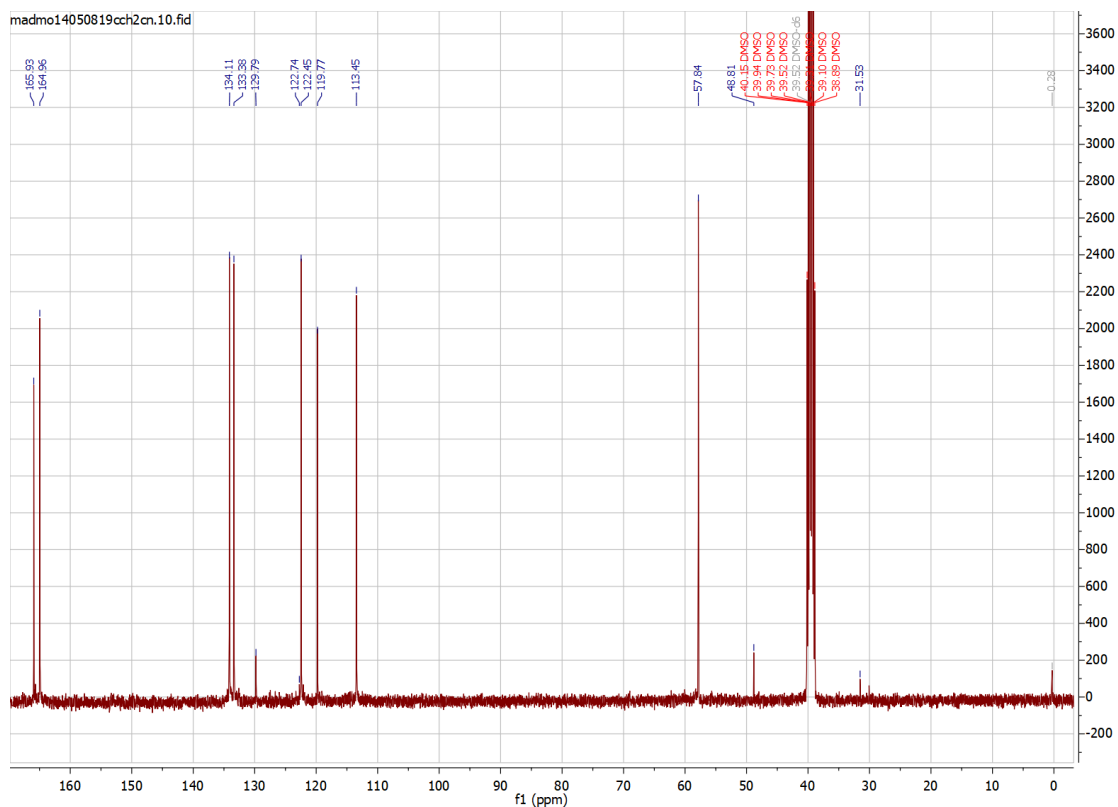

Figure S44.  $^{13}\text{C}$  NMR spectrum of  $\text{Co}(\text{salen})\text{CH}_2\text{CN}$  in  $d_6$ -DMSO.

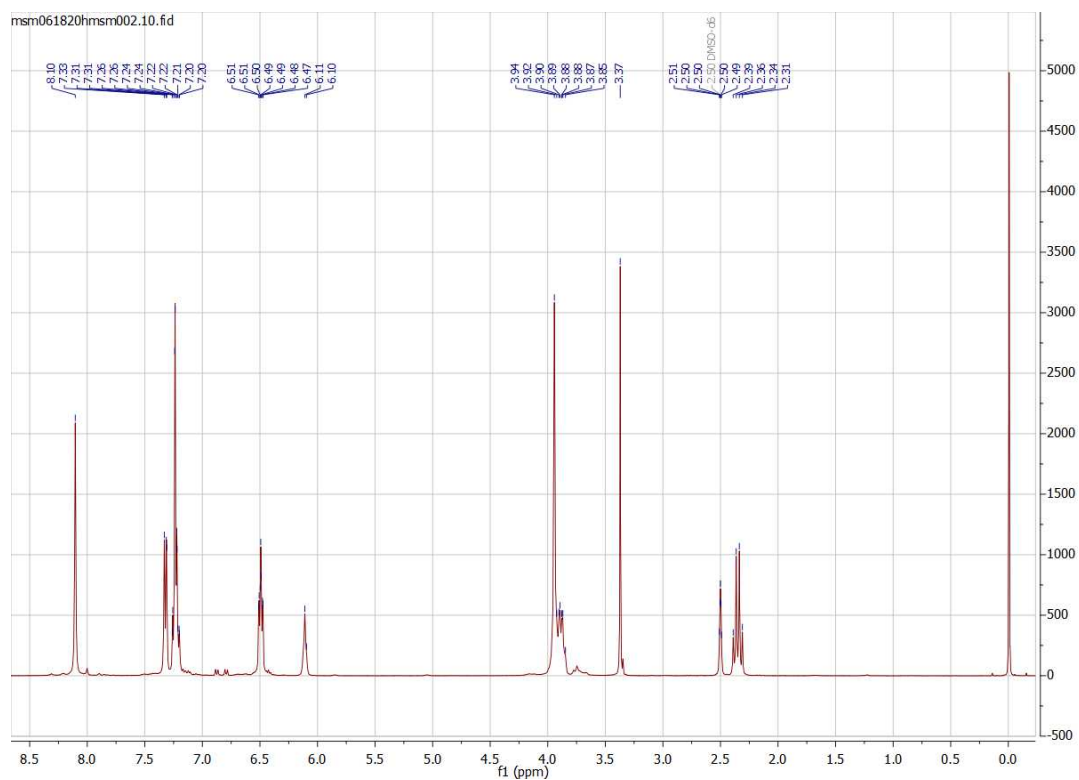

Figure S55.  $^1\text{H}$  NMR spectrum of  $\text{Co}(\text{salen})\text{OCH}_2\text{CF}_3$  in  $d_6$ -DMSO.



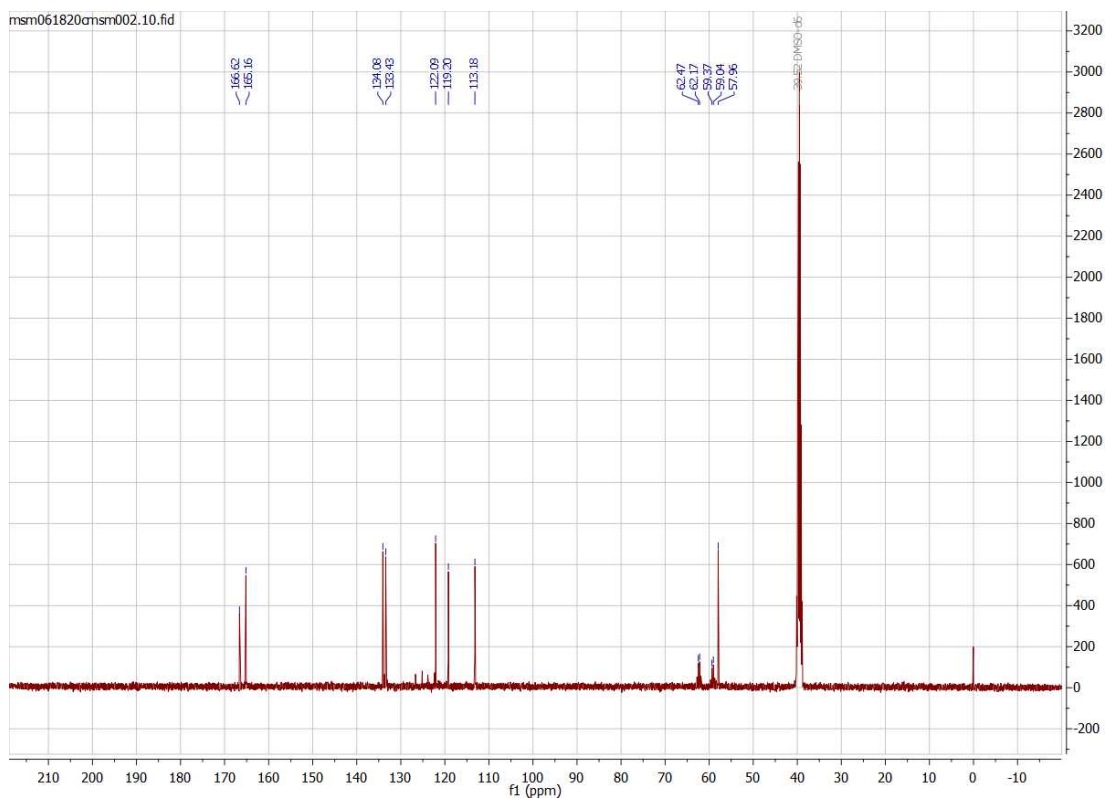

Figure S26.  $^{13}\text{C}$  NMR spectrum of  $\text{Co}(\text{salen})\text{OCH}_2\text{CF}_3$  in  $d_6$ -DMSO.

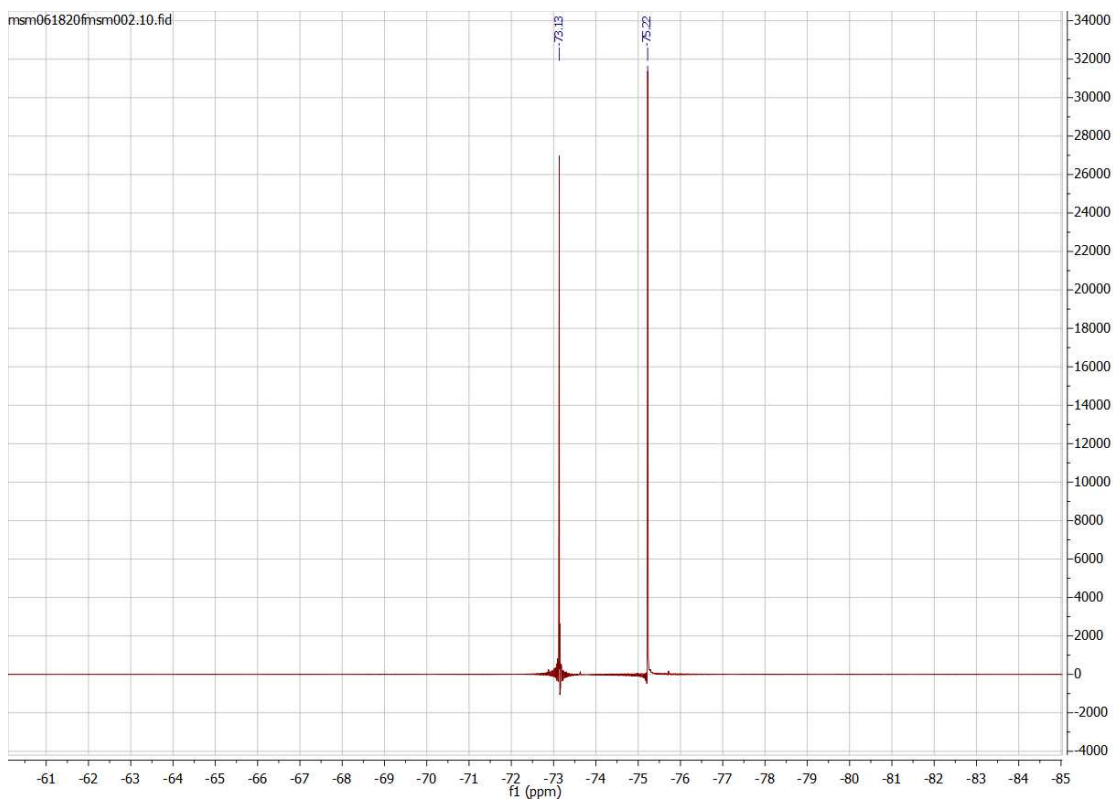

Figure S27.  $^{19}\text{F}$  NMR spectrum of  $\text{Co}(\text{salen})\text{OCH}_2\text{CF}_3$  in  $d_6$ -DMSO.

## DFT coordinates

### Mechanism figure 8.

| <i>Co(salen)</i> |               |               |               |
|------------------|---------------|---------------|---------------|
| atom             | x             | y             | z             |
| Co1              | 0.6958810000  | 2.2139670000  | 2.4847250000  |
| C2               | 1.2590780000  | -0.4508210000 | 3.4246920000  |
| C3               | 0.0615900000  | 4.8475530000  | 1.5419520000  |
| C4               | 0.3518200000  | 5.4502860000  | 2.8075120000  |
| C5               | 0.2790670000  | 6.8599910000  | 2.8987160000  |
| C6               | 0.5130060000  | 7.5264060000  | 4.0867350000  |
| C7               | 0.8209300000  | 6.7736950000  | 5.2354660000  |
| C8               | 0.8931580000  | 5.3931220000  | 5.1843360000  |
| C9               | 0.6691200000  | 4.6791520000  | 3.9771270000  |
| C13              | 1.5308900000  | -1.3527980000 | 4.4877940000  |
| C14              | 1.5805520000  | -2.7205420000 | 4.2855340000  |
| C15              | 1.3687230000  | -3.2720630000 | 3.0078000000  |
| C16              | 1.1118170000  | -2.4196590000 | 1.9504700000  |
| C17              | 1.0472190000  | -1.0166910000 | 2.1215130000  |
| C18              | 0.8088230000  | -0.2130240000 | 0.9610260000  |
| C19              | 0.5349980000  | 1.8119160000  | -0.2967360000 |
| C20              | -0.2832840000 | 3.0557740000  | -0.0157260000 |
| H21              | -0.2700200000 | 5.5177180000  | 0.7366000000  |
| H22              | 0.0292810000  | 7.4199590000  | 1.9954810000  |
| H23              | 0.4568200000  | 8.6123340000  | 4.1353420000  |
| H24              | 1.0050850000  | 7.2827690000  | 6.1823960000  |
| H25              | 1.1302730000  | 4.8129400000  | 6.0760500000  |
| H33              | 1.6961840000  | -0.9283600000 | 5.4780200000  |
| H34              | 1.7876420000  | -3.3775360000 | 5.1312020000  |
| H35              | 1.4100140000  | -4.3490920000 | 2.8557110000  |
| H36              | 0.9521060000  | -2.8218050000 | 0.9480480000  |
| H37              | 0.7600810000  | -0.7362720000 | -0.0040860000 |
| H38              | 1.5441700000  | 2.0918360000  | -0.6323330000 |
| H39              | 0.0804060000  | 1.1886680000  | -1.0779400000 |
| H40              | -1.3498670000 | 2.7979610000  | 0.0556630000  |
| H41              | -0.1701920000 | 3.8095020000  | -0.8060060000 |
| N42              | 0.6597750000  | 1.0779760000  | 0.9672170000  |
| N43              | 0.1493300000  | 3.5767490000  | 1.2852670000  |
| O45              | 1.2301050000  | 0.8287930000  | 3.6882100000  |
| O46              | 0.7523320000  | 3.3752200000  | 4.0021830000  |

| <i>Co(salen)O<sub>2</sub>(MeOH)</i> |               |              |              |
|-------------------------------------|---------------|--------------|--------------|
| atom                                | x             | y            | z            |
| O47                                 | -0.9620290000 | 1.8467220000 | 2.7154780000 |

|      |               |               |               |
|------|---------------|---------------|---------------|
| O49  | -1.9383100000 | 1.8158040000  | 1.8890690000  |
| Co50 | -3.7008690000 | 2.1902900000  | 2.5270940000  |
| N51  | -3.4961680000 | 1.0834460000  | 4.0702400000  |
| N52  | -3.0540090000 | 3.5862200000  | 3.6784000000  |
| O53  | -4.3349360000 | 0.7341780000  | 1.4291700000  |
| O54  | -3.9581150000 | 3.3532340000  | 1.0052570000  |
| O8   | -5.7844810000 | 2.4392300000  | 2.9708070000  |
| C56  | -3.3365920000 | -0.1981110000 | 4.0480760000  |
| C57  | -3.4511860000 | 1.8554460000  | 5.3062930000  |
| C58  | -2.7188690000 | 4.7771090000  | 3.2938060000  |
| C59  | -2.6657280000 | 3.1189290000  | 5.0146150000  |
| C60  | -3.9635170000 | -0.5024160000 | 1.6306430000  |
| C61  | -3.5015770000 | 4.5701330000  | 0.9069080000  |
| C15  | -6.2607730000 | 3.7813680000  | 3.1374810000  |
| C63  | -3.4492220000 | -1.0106520000 | 2.8727330000  |
| H64  | -3.1083250000 | -0.7086220000 | 4.9949610000  |
| H65  | -4.4841430000 | 2.1031900000  | 5.5914350000  |
| H66  | -3.0035910000 | 1.2740330000  | 6.1237590000  |
| C67  | -2.8911770000 | 5.3100440000  | 1.9782080000  |
| H68  | -2.2468160000 | 5.4393370000  | 4.0344060000  |
| H69  | -1.5894580000 | 2.8984920000  | 5.0001460000  |
| H70  | -2.8459440000 | 3.8965050000  | 5.7680500000  |
| C71  | -4.1050810000 | -1.4298480000 | 0.5653530000  |
| C72  | -3.6234590000 | 5.2347970000  | -0.3438000000 |
| C75  | -3.0986080000 | -2.3746330000 | 2.9834170000  |
| C76  | -2.4226730000 | 6.6257510000  | 1.7476600000  |
| C77  | -3.7442990000 | -2.7587910000 | 0.7056610000  |
| H78  | -4.5020370000 | -1.0554320000 | -0.3778740000 |
| C79  | -3.1533700000 | 6.5216760000  | -0.5334860000 |
| H80  | -4.0911240000 | 4.6860100000  | -1.1607230000 |
| C83  | -3.2289410000 | -3.2481190000 | 1.9195090000  |
| H84  | -2.7151010000 | -2.7298390000 | 3.9421130000  |
| C85  | -2.5391110000 | 7.2350460000  | 0.5136210000  |
| H86  | -1.9528570000 | 7.1554950000  | 2.5792440000  |
| H87  | -3.8604840000 | -3.4328310000 | -0.1439750000 |
| H88  | -3.2573090000 | 6.9852850000  | -1.5153460000 |
| H95  | -2.9435490000 | -4.2935370000 | 2.0205600000  |
| H96  | -2.1632680000 | 8.2439750000  | 0.3534400000  |
| H40  | -7.3510790000 | 3.7836710000  | 3.2402520000  |
| H41  | -5.8075220000 | 4.1628290000  | 4.0560130000  |
| H42  | -5.9620670000 | 4.4149490000  | 2.2947080000  |
| H43  | -6.2031500000 | 2.0556300000  | 2.1731990000  |

*Co(salen)O<sub>2</sub>(CH<sub>3</sub>CN)*

atom                    x                    y                    z

|      |               |               |               |
|------|---------------|---------------|---------------|
| O47  | -1.0341180000 | 1.5775900000  | 2.5243470000  |
| O49  | -2.0516200000 | 1.6429440000  | 1.7496750000  |
| Co50 | -3.7111660000 | 2.2761300000  | 2.4661270000  |
| N51  | -3.5413260000 | 1.1636270000  | 4.0149100000  |
| N52  | -2.8200430000 | 3.5916150000  | 3.5549910000  |
| O53  | -4.5436570000 | 0.8691560000  | 1.4198180000  |
| O54  | -3.8258040000 | 3.4015730000  | 0.8915740000  |
| N8   | -5.5701970000 | 2.9761890000  | 3.0556220000  |
| C56  | -3.4742590000 | -0.1262920000 | 3.9873330000  |
| C57  | -3.3334420000 | 1.9388140000  | 5.2302560000  |
| C58  | -2.4916360000 | 4.7822110000  | 3.1727570000  |
| C59  | -2.4089340000 | 3.0880000000  | 4.8678450000  |
| C60  | -4.2215740000 | -0.3828100000 | 1.5977990000  |
| C61  | -3.3704850000 | 4.6185940000  | 0.8100950000  |
| C15  | -6.6226750000 | 3.4076300000  | 3.2937030000  |
| C63  | -3.6908720000 | -0.9271690000 | 2.8185940000  |
| H64  | -3.2320790000 | -0.6523570000 | 4.9223130000  |
| H65  | -4.3083560000 | 2.3247640000  | 5.5607410000  |
| H66  | -2.9191350000 | 1.3163870000  | 6.0347720000  |
| C67  | -2.7287800000 | 5.3404690000  | 1.8761650000  |
| H68  | -1.9654000000 | 5.4246530000  | 3.8941350000  |
| H69  | -1.3759330000 | 2.7240800000  | 4.7873100000  |
| H70  | -2.4351260000 | 3.8874310000  | 5.6196030000  |
| C71  | -4.4349310000 | -1.2937070000 | 0.5293950000  |
| C72  | -3.5028300000 | 5.2983560000  | -0.4328090000 |
| C26  | -7.9304640000 | 3.9421930000  | 3.5869350000  |
| C75  | -3.4033700000 | -2.3073060000 | 2.9086010000  |
| C76  | -2.2634990000 | 6.6583220000  | 1.6524280000  |
| C77  | -4.1293470000 | -2.6383690000 | 0.6473140000  |
| H78  | -4.8375820000 | -0.8926350000 | -0.4004190000 |
| C79  | -3.0311770000 | 6.5859720000  | -0.6160770000 |
| H80  | -3.9831970000 | 4.7593960000  | -1.2496880000 |
| C83  | -3.6045560000 | -3.1637410000 | 1.8420440000  |
| H84  | -3.0060510000 | -2.6889190000 | 3.8516170000  |
| C85  | -2.4028420000 | 7.2871450000  | 0.4304030000  |
| H86  | -1.7741300000 | 7.1743780000  | 2.4811180000  |
| H87  | -4.2952540000 | -3.2968320000 | -0.2063630000 |
| H88  | -3.1468760000 | 7.0603720000  | -1.5916560000 |
| H95  | -3.3630590000 | -4.2219040000 | 1.9248610000  |
| H96  | -2.0286740000 | 8.2989180000  | 0.2778590000  |
| H41  | -7.8343920000 | 4.9382920000  | 4.0337220000  |
| H42  | -8.5157090000 | 4.0198560000  | 2.6628170000  |
| H43  | -8.4591830000 | 3.2837820000  | 4.2878260000  |

*Co(salen)O<sub>2</sub>*

| atom | x             | y             | z             |
|------|---------------|---------------|---------------|
| O47  | -1.2909180000 | 1.9058620000  | 2.4603450000  |
| O49  | -2.3803320000 | 1.9124660000  | 1.8363160000  |
| Co50 | -4.1274430000 | 2.2658240000  | 2.8260970000  |
| N51  | -3.6262970000 | 1.0956170000  | 4.2403370000  |
| N52  | -3.1966600000 | 3.5886040000  | 3.8601670000  |
| O53  | -4.8614780000 | 0.7833930000  | 1.8035550000  |
| O54  | -4.5812420000 | 3.5008980000  | 1.4224910000  |
| C56  | -3.1820770000 | -0.1030810000 | 4.0350620000  |
| C57  | -3.4524800000 | 1.8121010000  | 5.4979000000  |
| C58  | -2.5886120000 | 4.5896740000  | 3.2971170000  |
| C59  | -2.7273050000 | 3.1139120000  | 5.1740010000  |
| C60  | -4.0766060000 | -0.2623070000 | 1.6886250000  |
| C61  | -3.6907110000 | 4.3801520000  | 1.0381590000  |
| C63  | -3.2486400000 | -0.7581990000 | 2.7567910000  |
| H64  | -2.6895710000 | -0.6349550000 | 4.8617970000  |
| H65  | -4.4472760000 | 2.0216070000  | 5.9131380000  |
| H66  | -2.8918690000 | 1.2130050000  | 6.2283410000  |
| C67  | -2.7188220000 | 4.9685320000  | 1.9206660000  |
| H68  | -1.8549800000 | 5.1522960000  | 3.8924320000  |
| H69  | -1.6446200000 | 2.9338000000  | 5.1098740000  |
| H70  | -2.8955710000 | 3.8695260000  | 5.9516600000  |
| C71  | -4.0165590000 | -0.9578140000 | 0.4542350000  |
| C72  | -3.6602050000 | 4.7869750000  | -0.3206320000 |
| C75  | -2.4180760000 | -1.8785690000 | 2.5445210000  |
| C76  | -1.7875340000 | 5.9042630000  | 1.4144390000  |
| C77  | -3.1672710000 | -2.0384270000 | 0.2693810000  |
| H78  | -4.6296450000 | -0.5893620000 | -0.3674190000 |
| C79  | -2.7173020000 | 5.6890830000  | -0.7874520000 |
| H80  | -4.3818070000 | 4.3357060000  | -1.0010580000 |
| C83  | -2.3543320000 | -2.5105420000 | 1.3137250000  |
| H84  | -1.7922360000 | -2.2241200000 | 3.3690670000  |
| C85  | -1.7675500000 | 6.2600720000  | 0.0778590000  |
| H86  | -1.0545010000 | 6.3274880000  | 2.1032110000  |
| H87  | -3.1201920000 | -2.5182230000 | -0.7090780000 |
| H88  | -2.7042290000 | 5.9473490000  | -1.8473180000 |
| H95  | -1.6813850000 | -3.3517810000 | 1.1558210000  |
| H96  | -1.0264340000 | 6.9627470000  | -0.2989220000 |

*Co(salen)OOH(MeOH)*

| atom | x             | y            | z            |
|------|---------------|--------------|--------------|
| O1   | -0.9185080000 | 2.3465780000 | 1.3647090000 |
| O49  | -1.6483160000 | 1.6082350000 | 2.3488340000 |

|      |               |               |               |
|------|---------------|---------------|---------------|
| Co50 | -3.4454480000 | 2.1604930000  | 2.5108720000  |
| N51  | -3.5109980000 | 1.0753830000  | 4.0904450000  |
| N52  | -2.9372680000 | 3.5567390000  | 3.7164720000  |
| O53  | -4.0092910000 | 0.7353430000  | 1.3302850000  |
| O54  | -3.5384170000 | 3.3117680000  | 0.9673830000  |
| O8   | -5.5583600000 | 2.4382490000  | 2.7043510000  |
| C56  | -3.5834960000 | -0.2137570000 | 4.1117220000  |
| C57  | -3.4648450000 | 1.8623340000  | 5.3190100000  |
| C58  | -2.7865080000 | 4.8063600000  | 3.4181290000  |
| C59  | -2.5735600000 | 3.0546900000  | 5.0398170000  |
| C60  | -3.9269230000 | -0.5307350000 | 1.6332710000  |
| C61  | -3.3586000000 | 4.6013340000  | 0.9739730000  |
| C15  | -6.1304220000 | 3.7456570000  | 2.8344090000  |
| C63  | -3.7167120000 | -1.0504720000 | 2.9570960000  |
| H64  | -3.5549880000 | -0.7147480000 | 5.0904990000  |
| H65  | -4.4861300000 | 2.2007590000  | 5.5516560000  |
| H66  | -3.1053310000 | 1.2620720000  | 6.1655990000  |
| C67  | -3.0049830000 | 5.3825810000  | 2.1280170000  |
| H68  | -2.4648520000 | 5.4885400000  | 4.2186540000  |
| H69  | -1.5215960000 | 2.7380990000  | 5.0046990000  |
| H70  | -2.6775740000 | 3.8377790000  | 5.8026640000  |
| C71  | -4.0918680000 | -1.4827000000 | 0.5922080000  |
| C72  | -3.5367770000 | 5.3102820000  | -0.2457060000 |
| C75  | -3.6878260000 | -2.4476860000 | 3.1691010000  |
| C76  | -2.8553610000 | 6.7842840000  | 2.0135020000  |
| C77  | -4.0524090000 | -2.8442600000 | 0.8338450000  |
| H78  | -4.2540980000 | -1.1004710000 | -0.4153130000 |
| C79  | -3.3861940000 | 6.6832260000  | -0.3210970000 |
| H80  | -3.8023310000 | 4.7301920000  | -1.1287300000 |
| C83  | -3.8466180000 | -3.3467340000 | 2.1317760000  |
| H84  | -3.5360790000 | -2.8065780000 | 4.1894500000  |
| C85  | -3.0420040000 | 7.4418640000  | 0.8131230000  |
| H86  | -2.5849530000 | 7.3450180000  | 2.9106750000  |
| H87  | -4.1834040000 | -3.5353290000 | 0.0005610000  |
| H88  | -3.5364280000 | 7.1822160000  | -1.2794020000 |
| H95  | -3.8166250000 | -4.4189720000 | 2.3161520000  |
| H96  | -2.9230110000 | 8.5217210000  | 0.7451900000  |
| H48  | -1.2167120000 | 1.9543560000  | 0.5184490000  |
| H41  | -7.2208190000 | 3.6740190000  | 2.9006790000  |
| H42  | -5.7386470000 | 4.1688430000  | 3.7608400000  |
| H43  | -5.8544400000 | 4.3898610000  | 1.9933320000  |
| H44  | -5.8690230000 | 2.0398940000  | 1.8675380000  |

*Co(salen)CH<sub>2</sub>CN(MeOH)*

atom                    x                    y                    z

|      |               |               |               |
|------|---------------|---------------|---------------|
| Co50 | -3.4851320000 | 2.5509860000  | 2.6066440000  |
| N51  | -3.3845870000 | 1.4073150000  | 4.1267390000  |
| N52  | -3.1506860000 | 3.9566760000  | 3.8561720000  |
| O53  | -3.8817560000 | 1.1026240000  | 1.3965550000  |
| O54  | -3.7005660000 | 3.7334430000  | 1.1030970000  |
| O6   | -5.6536930000 | 2.5805180000  | 2.8414900000  |
| C56  | -3.2151450000 | 0.1251950000  | 4.0993590000  |
| C57  | -3.5425640000 | 2.1369550000  | 5.3818760000  |
| C58  | -2.9624970000 | 5.2057040000  | 3.5605770000  |
| C59  | -2.8561220000 | 3.4768570000  | 5.2102210000  |
| C60  | -3.5189640000 | -0.1324510000 | 1.6131940000  |
| C61  | -3.3948330000 | 5.0005060000  | 1.0877720000  |
| C13  | -6.2999130000 | 3.8558970000  | 2.9026800000  |
| C63  | -3.1654360000 | -0.6635860000 | 2.9021450000  |
| H64  | -3.1102220000 | -0.4047650000 | 5.0571200000  |
| H65  | -4.6187960000 | 2.2814340000  | 5.5565560000  |
| H66  | -3.1330700000 | 1.5695790000  | 6.2283860000  |
| C67  | -3.0419420000 | 5.7711870000  | 2.2492380000  |
| H68  | -2.6952350000 | 5.8905580000  | 4.3782390000  |
| H69  | -1.7654630000 | 3.3580800000  | 5.3023240000  |
| H70  | -3.1787100000 | 4.2048590000  | 5.9657010000  |
| C71  | -3.4924750000 | -1.0314620000 | 0.5140140000  |
| C72  | -3.4291150000 | 5.6871490000  | -0.1566480000 |
| C75  | -2.8114710000 | -2.0265700000 | 3.0258020000  |
| C76  | -2.7343790000 | 7.1458000000  | 2.1125380000  |
| C77  | -3.1332880000 | -2.3587770000 | 0.6701920000  |
| H78  | -3.7616660000 | -0.6352210000 | -0.4649340000 |
| C79  | -3.1207250000 | 7.0324500000  | -0.2533360000 |
| H80  | -3.6991740000 | 5.1098860000  | -1.0406990000 |
| C83  | -2.7828540000 | -2.8725430000 | 1.9326260000  |
| H84  | -2.5558380000 | -2.4028840000 | 4.0183390000  |
| C85  | -2.7640380000 | 7.7802810000  | 0.8853430000  |
| H86  | -2.4598580000 | 7.7023950000  | 3.0110550000  |
| H87  | -3.1199870000 | -3.0130550000 | -0.2024550000 |
| H88  | -3.1500690000 | 7.5166460000  | -1.2305280000 |
| H95  | -2.4985380000 | -3.9170910000 | 2.0463610000  |
| H96  | -2.5147530000 | 8.8367050000  | 0.7994050000  |
| C46  | -1.5627330000 | 2.2800480000  | 2.1479840000  |
| H47  | -1.3364450000 | 1.2334960000  | 2.3890180000  |
| C49  | -0.6159300000 | 3.1404890000  | 2.7721020000  |
| N41  | 0.1543530000  | 3.8507270000  | 3.3028360000  |
| H42  | -1.5679570000 | 2.4263150000  | 1.0620640000  |
| H43  | -6.0093910000 | 4.4885640000  | 2.0552860000  |
| H44  | -5.9370450000 | 2.1253530000  | 2.0248230000  |
| H45  | -5.9744900000 | 4.3280670000  | 3.8335860000  |

H46 -7.3884730000 3.7314370000 2.9199370000

*(MeOH)Co(salen)O<sub>2</sub>Co(salen)(MeOH)*

| atom | x             | y             | z             |
|------|---------------|---------------|---------------|
| Co1  | 0.7961170000  | 2.1905690000  | 2.3984170000  |
| C2   | 1.2388150000  | -0.5001970000 | 3.1905270000  |
| C3   | 0.1267900000  | 4.8685150000  | 1.6356050000  |
| C4   | 0.4248480000  | 5.3919250000  | 2.9367500000  |
| C5   | 0.3033190000  | 6.7875970000  | 3.1209970000  |
| C6   | 0.5078600000  | 7.3853420000  | 4.3509680000  |
| C7   | 0.8477390000  | 6.5699770000  | 5.4469250000  |
| C8   | 0.9832420000  | 5.2010570000  | 5.3016960000  |
| C9   | 0.7868580000  | 4.5548030000  | 4.0488140000  |
| C10  | 3.6674620000  | 3.4350690000  | 2.6438910000  |
| C13  | 1.4143080000  | -1.4537200000 | 4.2264530000  |
| C14  | 1.1015810000  | -2.7911670000 | 4.0473060000  |
| C15  | 0.6010650000  | -3.2590020000 | 2.8209650000  |
| C16  | 0.4264320000  | -2.3555020000 | 1.7871920000  |
| C17  | 0.7256200000  | -0.9858910000 | 1.9375870000  |
| C18  | 0.5711540000  | -0.1406970000 | 0.7890820000  |
| C19  | 0.5635870000  | 1.9631960000  | -0.3942230000 |
| C20  | -0.2759250000 | 3.1715730000  | -0.0136650000 |
| H21  | -0.1851150000 | 5.5958780000  | 0.8714220000  |
| H22  | 0.0311380000  | 7.3947720000  | 2.2548200000  |
| H23  | 0.4079100000  | 8.4631270000  | 4.4701990000  |
| H24  | 1.0115090000  | 7.0216680000  | 6.4267790000  |
| H25  | 1.2516270000  | 4.5724570000  | 6.1511450000  |
| H33  | 1.8046300000  | -1.0932640000 | 5.1781810000  |
| H34  | 1.2474600000  | -3.4873440000 | 4.8747140000  |
| H35  | 0.3505740000  | -4.3104460000 | 2.6874780000  |
| H36  | 0.0428260000  | -2.6946050000 | 0.8223990000  |
| H37  | 0.3460000000  | -0.6314040000 | -0.1693850000 |
| H38  | 1.5692150000  | 2.2875220000  | -0.6978890000 |
| H39  | 0.1157690000  | 1.3975180000  | -1.2229120000 |
| H40  | -1.3295560000 | 2.8758830000  | 0.0847780000  |
| H41  | -0.1955450000 | 3.9782480000  | -0.7551690000 |
| N42  | 0.6952320000  | 1.1443700000  | 0.8022370000  |
| N43  | 0.1702840000  | 3.6191270000  | 1.3035600000  |
| O45  | 1.5988290000  | 0.7349810000  | 3.4087100000  |
| O46  | 0.9536260000  | 3.2664030000  | 3.9878180000  |
| O47  | -0.8788310000 | 1.4951620000  | 2.9340060000  |
| O38  | 2.8985600000  | 2.5685730000  | 1.8038250000  |
| O49  | -1.8501120000 | 1.4944070000  | 2.0091900000  |
| Co50 | -3.5264510000 | 2.1881240000  | 2.5447760000  |
| N51  | -3.4162440000 | 1.1494890000  | 4.1465670000  |



|     |               |               |               |
|-----|---------------|---------------|---------------|
| N52 | -2.8975840000 | 3.6206990000  | 3.6339190000  |
| O53 | -4.3250890000 | 0.7224190000  | 1.5419950000  |
| O54 | -3.6906710000 | 3.2597490000  | 0.9526500000  |
| O48 | -5.6283460000 | 2.5530240000  | 3.1170810000  |
| C56 | -3.2864430000 | -0.1346700000 | 4.1656310000  |
| C57 | -3.2869050000 | 1.9727410000  | 5.3399670000  |
| C58 | -2.8460850000 | 4.8682330000  | 3.2959560000  |
| C59 | -2.4500460000 | 3.1804380000  | 4.9535820000  |
| C60 | -3.9581410000 | -0.5104740000 | 1.7676020000  |
| C61 | -3.5090010000 | 4.5463680000  | 0.8844790000  |
| C52 | -6.3616360000 | 3.5372440000  | 2.3809660000  |
| C63 | -3.4376800000 | -0.9858580000 | 3.0206720000  |
| H64 | -3.0575880000 | -0.6202540000 | 5.1257390000  |
| H65 | -4.2928690000 | 2.2959420000  | 5.6430530000  |
| H66 | -2.8375030000 | 1.4113700000  | 6.1705750000  |
| C67 | -3.1390260000 | 5.3862860000  | 1.9919260000  |
| H68 | -2.5307310000 | 5.5976150000  | 4.0567960000  |
| H69 | -1.3958210000 | 2.8865330000  | 4.8567530000  |
| H70 | -2.5315750000 | 3.9911470000  | 5.6903780000  |
| C71 | -4.1291790000 | -1.4702290000 | 0.7374830000  |
| C72 | -3.6959170000 | 5.1874910000  | -0.3721740000 |
| C75 | -3.1254180000 | -2.3519130000 | 3.1758860000  |
| C76 | -3.0032590000 | 6.7796490000  | 1.8005820000  |
| C77 | -3.8036220000 | -2.8042330000 | 0.9208830000  |
| H78 | -4.5262100000 | -1.1182260000 | -0.2145430000 |
| C79 | -3.5449520000 | 6.5541250000  | -0.5250230000 |
| H80 | -3.9678560000 | 4.5570120000  | -1.2192040000 |
| C83 | -3.2943680000 | -3.2618320000 | 2.1467900000  |
| H84 | -2.7355340000 | -2.6825740000 | 4.1406510000  |
| C85 | -3.1990810000 | 7.3724830000  | 0.5669780000  |
| H86 | -2.7258580000 | 7.3883430000  | 2.6641220000  |
| H87 | -3.9463780000 | -3.5047280000 | 0.0966430000  |
| H88 | -3.7012980000 | 7.0010160000  | -1.5082980000 |
| H95 | -3.0328000000 | -4.3100160000 | 2.2840780000  |
| H96 | -3.0867510000 | 8.4484150000  | 0.4420400000  |
| H77 | -7.4103530000 | 3.5499290000  | 2.7025500000  |
| H79 | -5.9028670000 | 4.5042940000  | 2.6058640000  |
| H81 | 4.7191750000  | 3.4298920000  | 2.3344260000  |
| H82 | 3.2586920000  | 4.4402740000  | 2.5164190000  |
| H83 | 3.5825810000  | 3.1448390000  | 3.6968420000  |
| H85 | -6.3012870000 | 3.3551210000  | 1.3012660000  |
| H89 | 3.2423730000  | 1.6626830000  | 1.9207410000  |
| H90 | -5.9883790000 | 1.6750140000  | 2.8824150000  |

*Co(salen)O(MeOH)*

| atom | x             | y             | z             |
|------|---------------|---------------|---------------|
| O49  | -1.8857320000 | 1.8728080000  | 2.0876250000  |
| Co50 | -3.5590470000 | 2.2073580000  | 2.4650240000  |
| N51  | -3.4978270000 | 1.0985490000  | 4.0278450000  |
| N52  | -3.0092700000 | 3.6100720000  | 3.6552010000  |
| O53  | -4.2055520000 | 0.7757250000  | 1.3350390000  |
| O54  | -3.8366780000 | 3.3766340000  | 0.9627490000  |
| O7   | -5.6700720000 | 2.4387730000  | 2.8594010000  |
| C56  | -3.4402540000 | -0.1917210000 | 4.0162800000  |
| C57  | -3.4397980000 | 1.8789720000  | 5.2582740000  |
| C58  | -2.7470790000 | 4.8286650000  | 3.3090300000  |
| C59  | -2.5931520000 | 3.0990060000  | 4.9616560000  |
| C60  | -3.9322350000 | -0.4787710000 | 1.5664550000  |
| C61  | -3.4819460000 | 4.6315920000  | 0.9092250000  |
| C14  | -6.2267160000 | 3.7530020000  | 2.9722150000  |
| C63  | -3.5476060000 | -1.0087550000 | 2.8460100000  |
| H64  | -3.3104960000 | -0.7061270000 | 4.9794240000  |
| H65  | -4.4635330000 | 2.1812540000  | 5.5230690000  |
| H66  | -3.0317810000 | 1.2832960000  | 6.0853870000  |
| C67  | -2.9529220000 | 5.3881900000  | 2.0092160000  |
| H68  | -2.3244310000 | 5.4971050000  | 4.0733310000  |
| H69  | -1.5341570000 | 2.8132390000  | 4.8902050000  |
| H70  | -2.6926720000 | 3.8693300000  | 5.7368940000  |
| C71  | -4.0693800000 | -1.4056250000 | 0.4992620000  |
| C72  | -3.6500480000 | 5.3157920000  | -0.3246440000 |
| C75  | -3.3266740000 | -2.3972900000 | 2.9953960000  |
| C76  | -2.6068040000 | 6.7481390000  | 1.8242890000  |
| C77  | -3.8388360000 | -2.7582350000 | 0.6786980000  |
| H78  | -4.3636490000 | -1.0127700000 | -0.4736010000 |
| C79  | -3.3028560000 | 6.6471570000  | -0.4687260000 |
| H80  | -4.0559510000 | 4.7500870000  | -1.1625720000 |
| C83  | -3.4592080000 | -3.2715060000 | 1.9329970000  |
| H84  | -3.0444090000 | -2.7704900000 | 3.9820810000  |
| C85  | -2.7703010000 | 7.3814550000  | 0.6076130000  |
| H86  | -2.1968930000 | 7.2937450000  | 2.6766500000  |
| H87  | -3.9528330000 | -3.4336210000 | -0.1702000000 |
| H88  | -3.4408710000 | 7.1300050000  | -1.4369760000 |
| H95  | -3.2778220000 | -4.3368690000 | 2.0644220000  |
| H96  | -2.4921270000 | 8.4265880000  | 0.4828720000  |
| H39  | -7.3121940000 | 3.6910710000  | 3.1092570000  |
| H40  | -5.7764770000 | 4.2113320000  | 3.8573480000  |
| H41  | -5.9962990000 | 4.3607330000  | 2.0885510000  |
| H42  | -6.0663130000 | 1.9917240000  | 2.0838070000  |

*Co(salen)OH(MeOH)*

| atom | x             | y             | z             |
|------|---------------|---------------|---------------|
| O49  | -1.4960270000 | 1.8329700000  | 2.2378010000  |
| Co50 | -3.3417760000 | 2.1860970000  | 2.4489150000  |
| N51  | -3.3944810000 | 1.1165880000  | 4.0323210000  |
| N52  | -2.9219890000 | 3.6187730000  | 3.6413090000  |
| O53  | -3.8312340000 | 0.7511780000  | 1.2600080000  |
| O54  | -3.4161240000 | 3.3123620000  | 0.8874130000  |
| O7   | -5.4270610000 | 2.3924760000  | 2.5843990000  |
| C56  | -3.5540070000 | -0.1603780000 | 4.0731630000  |
| C57  | -3.3213300000 | 1.9067820000  | 5.2600280000  |
| C58  | -2.8530840000 | 4.8710910000  | 3.3372700000  |
| C59  | -2.4972190000 | 3.1377260000  | 4.9529710000  |
| C60  | -3.9169310000 | -0.5032810000 | 1.6031690000  |
| C61  | -3.3823430000 | 4.6134610000  | 0.8925450000  |
| C14  | -6.0807250000 | 3.6493330000  | 2.7978220000  |
| C63  | -3.7738210000 | -1.0062830000 | 2.9396670000  |
| H64  | -3.5503880000 | -0.6455280000 | 5.0587880000  |
| H65  | -4.3431610000 | 2.1976420000  | 5.5422060000  |
| H66  | -2.9027960000 | 1.3224740000  | 6.0871210000  |
| C67  | -3.1228840000 | 5.4265310000  | 2.0469360000  |
| H68  | -2.5687050000 | 5.5747960000  | 4.1313230000  |
| H69  | -1.4332960000 | 2.8764870000  | 4.8881620000  |
| H70  | -2.6095800000 | 3.9142600000  | 5.7179760000  |
| C71  | -4.2031910000 | -1.4525720000 | 0.5884530000  |
| C72  | -3.6381270000 | 5.2944800000  | -0.3263840000 |
| C75  | -3.9186960000 | -2.3890430000 | 3.1872330000  |
| C76  | -3.1251700000 | 6.8345680000  | 1.9292310000  |
| C77  | -4.3425700000 | -2.7976880000 | 0.8682060000  |
| H78  | -4.3204230000 | -1.0805030000 | -0.4280480000 |
| C79  | -3.6431500000 | 6.6732560000  | -0.4017520000 |
| H80  | -3.8419470000 | 4.6881970000  | -1.2071530000 |
| C83  | -4.1977970000 | -3.2858730000 | 2.1777530000  |
| H84  | -3.8119950000 | -2.7376690000 | 4.2153380000  |
| C85  | -3.3840030000 | 7.4648760000  | 0.7305660000  |
| H86  | -2.9199210000 | 7.4241620000  | 2.8240380000  |
| H87  | -4.5712790000 | -3.4875490000 | 0.0563500000  |
| H88  | -3.8523520000 | 7.1514640000  | -1.3585510000 |
| H95  | -4.3106700000 | -4.3460230000 | 2.3921050000  |
| H96  | -3.3871220000 | 8.5506260000  | 0.6622850000  |
| H39  | -1.4085640000 | 1.8454840000  | 1.2734060000  |
| H40  | -7.1621420000 | 3.5010570000  | 2.8538100000  |
| H41  | -5.7262080000 | 4.0390590000  | 3.7515660000  |
| H42  | -5.8498280000 | 4.3639300000  | 2.0029790000  |
| H43  | -5.7215690000 | 2.0206310000  | 1.7357730000  |

*CH<sub>3</sub>CN*

| atom | x             | y             | z             |
|------|---------------|---------------|---------------|
| C1   | 0.0104990000  | 1.2859810000  | 0.0000000000  |
| C2   | 0.0030330000  | -0.1580540000 | 0.0000000000  |
| N3   | -0.0140990000 | -1.3250710000 | 0.0000000000  |
| H4   | 1.0421930000  | 1.6574510000  | 0.0000000000  |
| H5   | -0.5037090000 | 1.6617640000  | -0.8926880000 |
| H6   | -0.5037090000 | 1.6617640000  | 0.8926880000  |

*CH<sub>2</sub>CN*

| atom | x             | y             | z             |
|------|---------------|---------------|---------------|
| C1   | 0.0948210000  | 0.1120550000  | 0.1966230000  |
| C2   | 1.4580690000  | -0.0040810000 | 0.0110870000  |
| N3   | 2.6224190000  | -0.1099200000 | -0.1528390000 |
| H4   | -0.4375180000 | 0.9734470000  | -0.2050030000 |
| H5   | -0.4444800000 | -0.6592640000 | 0.7454150000  |

*O<sub>2</sub>*

| atom | x            | y            | z             |
|------|--------------|--------------|---------------|
| O47  | 0.0000000000 | 0.0000000000 | 0.6086740000  |
| O49  | 0.0000000000 | 0.0000000000 | -0.6086740000 |

*H<sub>2</sub>O<sub>2</sub>*

| atom | x             | y             | z            |
|------|---------------|---------------|--------------|
| O1   | -0.7328820000 | -0.0613730000 | 0.0000000000 |
| O2   | 0.7328820000  | 0.0613730000  | 0.0000000000 |
| H3   | -0.9867770000 | 0.8855320000  | 0.0000000000 |
| H4   | 0.9867770000  | -0.8855320000 | 0.0000000000 |

*MeOH*

| atom | x             | y             | z             |
|------|---------------|---------------|---------------|
| O1   | 0.0477050000  | -0.6918060000 | 0.0000000000  |
| C2   | 0.0049620000  | 0.7283310000  | 0.0000000000  |
| H3   | -0.8654980000 | -1.0297510000 | 0.0000000000  |
| H4   | 1.0389870000  | 1.0849240000  | 0.0000000000  |
| H5   | -0.4948410000 | 1.1260850000  | -0.8933970000 |
| H6   | -0.4948410000 | 1.1260850000  | 0.8933970000  |

*H<sub>2</sub>O*

| atom | x            | y             | z             |
|------|--------------|---------------|---------------|
| O1   | 0.0000000000 | 0.0000000000  | -0.0673550000 |
| H2   | 0.0000000000 | 0.7637350000  | 0.5344900000  |
| H3   | 0.0000000000 | -0.7637350000 | 0.5344900000  |

**Mechanism figure 9b.**

| <i>Co(salen)</i> |               |               |               |
|------------------|---------------|---------------|---------------|
| atom             | x             | y             | z             |
| Co1              | 0.7057600000  | 2.2154160000  | 2.4824200000  |
| C2               | 1.2577420000  | -0.4470210000 | 3.4220290000  |
| C3               | 0.0629390000  | 4.8478650000  | 1.5433890000  |
| C4               | 0.3508570000  | 5.4501510000  | 2.8073780000  |
| C5               | 0.2654860000  | 6.8590280000  | 2.9047320000  |
| C6               | 0.4943930000  | 7.5216610000  | 4.0947240000  |
| C7               | 0.8114420000  | 6.7664410000  | 5.2401690000  |
| C8               | 0.8974160000  | 5.3878530000  | 5.1836250000  |
| C9               | 0.6783490000  | 4.6766250000  | 3.9731180000  |
| C13              | 1.5294370000  | -1.3463710000 | 4.4879560000  |
| C14              | 1.5729970000  | -2.7136520000 | 4.2897770000  |
| C15              | 1.3555470000  | -3.2702100000 | 3.0147010000  |
| C16              | 1.0988090000  | -2.4218640000 | 1.9553470000  |
| C17              | 1.0397600000  | -1.0177310000 | 2.1215160000  |
| C18              | 0.8016770000  | -0.2153700000 | 0.9626430000  |
| C19              | 0.5333280000  | 1.8093610000  | -0.2963870000 |
| C20              | -0.2805140000 | 3.0564890000  | -0.0148480000 |
| H21              | -0.2744460000 | 5.5163460000  | 0.7388920000  |
| H22              | 0.0092470000  | 7.4208100000  | 2.0044860000  |
| H23              | 0.4274130000  | 8.6066760000  | 4.1482360000  |
| H24              | 0.9918130000  | 7.2733460000  | 6.1888670000  |
| H25              | 1.1405080000  | 4.8052370000  | 6.0716640000  |
| H33              | 1.6992230000  | -0.9176310000 | 5.4751010000  |
| H34              | 1.7799400000  | -3.3683370000 | 5.1372100000  |
| H35              | 1.3927720000  | -4.3479490000 | 2.8675160000  |
| H36              | 0.9348310000  | -2.8274000000 | 0.9551290000  |
| H37              | 0.7497130000  | -0.7381620000 | -0.0026560000 |
| H38              | 1.5425560000  | 2.0860040000  | -0.6349390000 |
| H39              | 0.0751390000  | 1.1869680000  | -1.0765880000 |
| H40              | -1.3479200000 | 2.8012330000  | 0.0573650000  |
| H41              | -0.1669720000 | 3.8092120000  | -0.8063580000 |
| N42              | 0.6570240000  | 1.0770660000  | 0.9673660000  |
| N43              | 0.1559310000  | 3.5769600000  | 1.2842550000  |
| O45              | 1.2347340000  | 0.8311220000  | 3.6804020000  |
| O46              | 0.7731470000  | 3.3758480000  | 3.9923530000  |

| <i>Co(salen)O<sub>2</sub>(CF<sub>3</sub>CH<sub>2</sub>OH)</i> |               |              |              |
|---------------------------------------------------------------|---------------|--------------|--------------|
| atom                                                          | x             | y            | z            |
| O47                                                           | -0.6766400000 | 1.7438130000 | 2.5444340000 |
| O49                                                           | -1.6995990000 | 1.7530650000 | 1.7900860000 |
| Co50                                                          | -3.4045990000 | 2.2032740000 | 2.5459340000 |

|     |               |               |               |
|-----|---------------|---------------|---------------|
| N51 | -3.1647210000 | 1.0844830000  | 4.0747010000  |
| N52 | -2.6478170000 | 3.5715600000  | 3.6493580000  |
| O53 | -4.2007950000 | 0.7836550000  | 1.5040240000  |
| O54 | -3.7514030000 | 3.3824660000  | 1.0655630000  |
| O8  | -5.5455350000 | 2.4155120000  | 3.0986420000  |
| C56 | -3.1103170000 | -0.2064210000 | 4.0559040000  |
| C57 | -2.9917950000 | 1.8528900000  | 5.3011640000  |
| C58 | -2.3751600000 | 4.7818570000  | 3.2768820000  |
| C59 | -2.1760500000 | 3.0815230000  | 4.9476070000  |
| C60 | -3.9170880000 | -0.4794740000 | 1.6914320000  |
| C61 | -3.3255630000 | 4.6099320000  | 0.9542790000  |
| C15 | -6.2487420000 | 3.6376380000  | 2.9435700000  |
| C63 | -3.3665650000 | -1.0176140000 | 2.9034070000  |
| H64 | -2.8641540000 | -0.7266200000 | 4.9927820000  |
| H65 | -3.9887520000 | 2.1478350000  | 5.6579630000  |
| H66 | -2.5118240000 | 1.2519610000  | 6.0853850000  |
| C67 | -2.6597580000 | 5.3443460000  | 1.9942950000  |
| H68 | -1.8733330000 | 5.4387940000  | 4.0017070000  |
| H69 | -1.1160790000 | 2.8097940000  | 4.8453840000  |
| H70 | -2.2573610000 | 3.8626000000  | 5.7149280000  |
| C71 | -4.2045460000 | -1.3957370000 | 0.6483650000  |
| C72 | -3.5508600000 | 5.2931750000  | -0.2713410000 |
| C75 | -3.1311070000 | -2.4059280000 | 3.0110470000  |
| C76 | -2.2520250000 | 6.6796310000  | 1.7636630000  |
| C77 | -3.9536500000 | -2.7495970000 | 0.7843200000  |
| H78 | -4.6254380000 | -0.9925640000 | -0.2719410000 |
| C79 | -3.1354500000 | 6.5983230000  | -0.4627920000 |
| H80 | -4.0553800000 | 4.7440890000  | -1.0651850000 |
| C83 | -3.4080720000 | -3.2718960000 | 1.9703150000  |
| H84 | -2.7193650000 | -2.7862790000 | 3.9478550000  |
| C85 | -2.4757550000 | 7.3106240000  | 0.5562840000  |
| H86 | -1.7418390000 | 7.2062840000  | 2.5725610000  |
| H87 | -4.1815370000 | -3.4185600000 | -0.0460780000 |
| H88 | -3.3191000000 | 7.0790100000  | -1.4244140000 |
| H95 | -3.2125250000 | -4.3378220000 | 2.0679370000  |
| H96 | -2.1474150000 | 8.3358500000  | 0.3945490000  |
| H40 | -7.2456410000 | 3.4757500000  | 2.5189260000  |
| C41 | -6.4106460000 | 4.2576840000  | 4.3104020000  |
| H42 | -5.6974680000 | 4.3348070000  | 2.3000910000  |
| H43 | -5.8391910000 | 1.7867490000  | 2.4075550000  |
| F44 | -7.0545410000 | 5.4406420000  | 4.2080490000  |
| F45 | -7.1234860000 | 3.4793980000  | 5.1504470000  |
| F46 | -5.2257470000 | 4.4959220000  | 4.9139180000  |

*Co(salen)OOH(CF<sub>3</sub>CH<sub>2</sub>OH)*

| atom | x             | y             | z             |
|------|---------------|---------------|---------------|
| O1   | -0.9385870000 | 2.3340440000  | 1.4133570000  |
| O49  | -1.6885610000 | 1.5305770000  | 2.3180550000  |
| Co50 | -3.4512500000 | 2.1307260000  | 2.5247220000  |
| N51  | -3.5304080000 | 1.0273310000  | 4.0891860000  |
| N52  | -2.9050550000 | 3.5056920000  | 3.7274960000  |
| O53  | -4.1330300000 | 0.7261390000  | 1.3725910000  |
| O54  | -3.5387110000 | 3.2890840000  | 0.9924890000  |
| O8   | -5.5892000000 | 2.4459320000  | 2.7109970000  |
| C56  | -3.5775000000 | -0.2638750000 | 4.0949400000  |
| C57  | -3.4506060000 | 1.8052040000  | 5.3204750000  |
| C58  | -2.7549150000 | 4.7593410000  | 3.4414340000  |
| C59  | -2.5286070000 | 2.9753890000  | 5.0351260000  |
| C60  | -3.9817470000 | -0.5474960000 | 1.6281970000  |
| C61  | -3.3669430000 | 4.5795370000  | 1.0069940000  |
| C15  | -6.1719800000 | 3.6801480000  | 2.3280080000  |
| C63  | -3.7097970000 | -1.0874220000 | 2.9298850000  |
| H64  | -3.5214380000 | -0.7772490000 | 5.0657520000  |
| H65  | -4.4596520000 | 2.1712950000  | 5.5616030000  |
| H66  | -3.0981400000 | 1.1918290000  | 6.1604740000  |
| C67  | -2.9964680000 | 5.3510220000  | 2.1624750000  |
| H68  | -2.4190990000 | 5.4308730000  | 4.2447080000  |
| H69  | -1.4885340000 | 2.6253600000  | 4.9707740000  |
| H70  | -2.5893580000 | 3.7495270000  | 5.8114880000  |
| C71  | -4.1413070000 | -1.4713730000 | 0.5649580000  |
| C72  | -3.5824510000 | 5.2981360000  | -0.2007770000 |
| C75  | -3.6201690000 | -2.4865360000 | 3.1044020000  |
| C76  | -2.8620790000 | 6.7553620000  | 2.0591700000  |
| C77  | -4.0403540000 | -2.8366500000 | 0.7689640000  |
| H78  | -4.3461760000 | -1.0657130000 | -0.4250840000 |
| C79  | -3.4490740000 | 6.6727210000  | -0.2629790000 |
| H80  | -3.8648960000 | 4.7221970000  | -1.0812800000 |
| C83  | -3.7758160000 | -3.3622250000 | 2.0460400000  |
| H84  | -3.4216470000 | -2.8679520000 | 4.1078590000  |
| C85  | -3.0848520000 | 7.4223300000  | 0.8714230000  |
| H86  | -2.5755050000 | 7.3094610000  | 2.9551770000  |
| H87  | -4.1671350000 | -3.5120380000 | -0.0778080000 |
| H88  | -3.6299990000 | 7.1819690000  | -1.2105140000 |
| H95  | -3.6972320000 | -4.4369020000 | 2.1984910000  |
| H96  | -2.9801580000 | 8.5041180000  | 0.8126610000  |
| H48  | -1.2565170000 | 2.0362040000  | 0.5361860000  |
| C41  | -7.5803480000 | 3.7648860000  | 2.8685190000  |
| H42  | -5.5830270000 | 4.4854110000  | 2.7771850000  |
| H43  | -6.1913050000 | 3.8116970000  | 1.2405910000  |

|     |               |              |              |
|-----|---------------|--------------|--------------|
| H44 | -5.7532950000 | 1.7792530000 | 2.0097160000 |
| F45 | -8.1511540000 | 4.9386780000 | 2.5208730000 |
| F46 | -8.3621110000 | 2.7718840000 | 2.3909240000 |
| F47 | -7.6159660000 | 3.6818080000 | 4.2156410000 |

*Co(salen)(CF<sub>3</sub>CHOH)(CF<sub>3</sub>CH<sub>2</sub>OH)*

| atom | x             | y             | z             |
|------|---------------|---------------|---------------|
| Co1  | 2.0680620000  | 5.7332810000  | 1.6751610000  |
| F2   | -0.6379190000 | 7.4437560000  | 1.2994630000  |
| F3   | -0.9465730000 | 6.3444870000  | 3.1681460000  |
| F4   | -0.6711220000 | 8.4955570000  | 3.1872850000  |
| F5   | 2.9011850000  | 4.3437100000  | -3.2352230000 |
| F6   | 4.4730190000  | 3.4242700000  | -2.0389950000 |
| F7   | 4.0277120000  | 5.5341740000  | -1.7997140000 |
| O11  | 1.8462840000  | 6.7952620000  | 0.1053480000  |
| O12  | 0.4322990000  | 4.9123270000  | 1.1633750000  |
| O13  | 1.5317730000  | 7.1475600000  | 4.1341560000  |
| O14  | 3.0315950000  | 4.0600620000  | 0.3312340000  |
| H15  | 3.2362080000  | 3.1620620000  | 0.6466170000  |
| N18  | 3.7978320000  | 6.4314360000  | 2.0335710000  |
| N19  | 2.4053890000  | 4.5536570000  | 3.1289110000  |
| C20  | 2.4687630000  | 7.9105240000  | -0.1353720000 |
| C21  | 1.9560540000  | 8.7680220000  | -1.1462510000 |
| H22  | 1.0475800000  | 8.4510050000  | -1.6575620000 |
| C23  | 2.5794710000  | 9.9595640000  | -1.4668230000 |
| H24  | 2.1516430000  | 10.5945090000 | -2.2439850000 |
| C25  | 3.7539930000  | 10.3666760000 | -0.8048460000 |
| H26  | 4.2370620000  | 11.3067040000 | -1.0663470000 |
| C27  | 4.2828930000  | 9.5503910000  | 0.1768980000  |
| H28  | 5.1992480000  | 9.8396680000  | 0.6957750000  |
| C29  | 3.6664010000  | 8.3303050000  | 0.5391910000  |
| C30  | 4.3058090000  | 7.5105520000  | 1.5245550000  |
| H31  | 5.3075530000  | 7.8179000000  | 1.8563940000  |
| C32  | 4.5733320000  | 5.5766230000  | 2.9283620000  |
| H33  | 5.3447480000  | 6.1503770000  | 3.4589610000  |
| H34  | 5.0795510000  | 4.8203540000  | 2.3117730000  |
| C35  | 3.6054710000  | 4.9049080000  | 3.8885360000  |
| H36  | 4.0502770000  | 4.0178140000  | 4.3579030000  |
| H37  | 3.3205520000  | 5.6091220000  | 4.6801070000  |
| C38  | 1.6950890000  | 3.5100230000  | 3.4353240000  |
| H39  | 2.0380840000  | 2.8819680000  | 4.2701680000  |
| C40  | 0.5005140000  | 3.0950320000  | 2.7658940000  |
| C41  | -0.1378790000 | 1.9150340000  | 3.2190420000  |
| H42  | 0.3075350000  | 1.3808550000  | 4.0608750000  |
| C43  | -1.2905170000 | 1.4362210000  | 2.6276760000  |



|     |               |              |               |
|-----|---------------|--------------|---------------|
| H44 | -1.7658780000 | 0.5266970000 | 2.9914700000  |
| C45 | -1.8432680000 | 2.1477830000 | 1.5436030000  |
| H46 | -2.7546890000 | 1.7838640000 | 1.0671180000  |
| C47 | -1.2505250000 | 3.3039670000 | 1.0751000000  |
| H48 | -1.6773880000 | 3.8610760000 | 0.2415360000  |
| C49 | -0.0627450000 | 3.8237540000 | 1.6614770000  |
| C50 | 1.2506460000  | 7.1722990000 | 2.7584510000  |
| H52 | 1.7406360000  | 8.0701430000 | 2.3618760000  |
| C53 | -0.2424410000 | 7.3444250000 | 2.5710890000  |
| C54 | 2.4327370000  | 3.9899580000 | -0.9508010000 |
| H55 | 1.6283170000  | 4.7327930000 | -0.9903900000 |
| H56 | 2.0188740000  | 2.9971550000 | -1.1651060000 |
| C57 | 3.4611730000  | 4.3293820000 | -2.0025190000 |
| H53 | 1.0056970000  | 6.4485890000 | 4.5640730000  |

*Co(salen)(CF<sub>3</sub>CH<sub>2</sub>O)(CF<sub>3</sub>CH<sub>2</sub>OH)*

| atom | x             | y             | z             |
|------|---------------|---------------|---------------|
| Co1  | 1.9829610000  | 5.8288770000  | 1.5063490000  |
| F2   | -2.1839950000 | 7.9255830000  | 2.8604940000  |
| F3   | -1.0884350000 | 6.1609350000  | 3.5181880000  |
| F4   | -0.6411550000 | 8.0948560000  | 4.3877880000  |
| F5   | 2.8306930000  | 3.9868080000  | -3.1890670000 |
| F6   | 4.3185760000  | 3.1865210000  | -1.8101100000 |
| F7   | 3.9708020000  | 5.3259820000  | -1.9048070000 |
| O11  | 1.8215810000  | 6.8251940000  | -0.1128060000 |
| O12  | 0.2820240000  | 5.0832620000  | 1.0437920000  |
| O13  | 1.3194900000  | 7.2789340000  | 2.5077140000  |
| O14  | 2.8432910000  | 4.2218630000  | 0.3795120000  |
| H15  | 2.9976250000  | 3.3741800000  | 0.8337670000  |
| N18  | 3.7294150000  | 6.4970170000  | 1.9083630000  |
| N19  | 2.1907100000  | 4.7763310000  | 3.0815860000  |
| C20  | 2.4625840000  | 7.9334650000  | -0.3459760000 |
| C21  | 1.9844360000  | 8.7788930000  | -1.3822840000 |
| H22  | 1.0855350000  | 8.4631640000  | -1.9112660000 |
| C23  | 2.6273160000  | 9.9593640000  | -1.7070710000 |
| H24  | 2.2242490000  | 10.5842770000 | -2.5050790000 |
| C25  | 3.7865420000  | 10.3666560000 | -1.0208350000 |
| H26  | 4.2844520000  | 11.2989410000 | -1.2811600000 |
| C27  | 4.2790270000  | 9.5608560000  | -0.0109020000 |
| H28  | 5.1792480000  | 9.8543030000  | 0.5329020000  |
| C29  | 3.6443270000  | 8.3517280000  | 0.3535590000  |
| C30  | 4.2343910000  | 7.5740070000  | 1.4021850000  |
| H31  | 5.1955780000  | 7.9288540000  | 1.8019900000  |
| C32  | 4.3729800000  | 5.7556200000  | 2.9844070000  |
| H33  | 5.1212680000  | 6.3695550000  | 3.5033610000  |

|     |               |              |               |
|-----|---------------|--------------|---------------|
| H34 | 4.8860790000  | 4.8837980000 | 2.5504970000  |
| C35 | 3.2647900000  | 5.2916320000 | 3.9201160000  |
| H36 | 3.6151130000  | 4.5369160000 | 4.6368910000  |
| H37 | 2.8695780000  | 6.1522490000 | 4.4780560000  |
| C38 | 1.4603570000  | 3.7606940000 | 3.4129320000  |
| H39 | 1.7120480000  | 3.2248070000 | 4.3396230000  |
| C40 | 0.3424140000  | 3.2730690000 | 2.6608900000  |
| C41 | -0.2786740000 | 2.0802450000 | 3.0993660000  |
| H42 | 0.1374510000  | 1.5772420000 | 3.9745750000  |
| C43 | -1.3793020000 | 1.5511360000 | 2.4537980000  |
| H44 | -1.8398950000 | 0.6294570000 | 2.8044810000  |
| C45 | -1.8997860000 | 2.2305600000 | 1.3353340000  |
| H46 | -2.7709460000 | 1.8289960000 | 0.8160390000  |
| C47 | -1.3266270000 | 3.4039530000 | 0.8838770000  |
| H48 | -1.7313250000 | 3.9360330000 | 0.0231930000  |
| C49 | -0.1895940000 | 3.9707990000 | 1.5219900000  |
| C50 | 0.0733440000  | 7.7379960000 | 2.1375220000  |
| H51 | -0.3031620000 | 7.2888560000 | 1.2060160000  |
| H52 | 0.0862510000  | 8.8340140000 | 1.9848120000  |
| C53 | -0.9516300000 | 7.4693850000 | 3.2192380000  |
| C54 | 2.2720500000  | 3.9950880000 | -0.9051850000 |
| H55 | 1.5094260000  | 4.7622090000 | -1.0735180000 |
| H56 | 1.8184800000  | 3.0010130000 | -0.9801290000 |
| C57 | 3.3545540000  | 4.1307230000 | -1.9507570000 |

*CF<sub>3</sub>CHOH*

| atom | x             | y             | z            |
|------|---------------|---------------|--------------|
| F5   | -1.1731250000 | -0.8368260000 | 5.0779750000 |
| F6   | -0.1033610000 | -2.5978930000 | 4.3868760000 |
| F7   | 0.7197890000  | -0.5902140000 | 4.0479210000 |
| O14  | 1.3719340000  | -0.3718330000 | 6.7557340000 |
| C54  | 0.8332850000  | -1.4844070000 | 6.2084780000 |
| H55  | 0.5802950000  | -2.2678650000 | 6.9179030000 |
| C57  | 0.0795860000  | -1.3849090000 | 4.9484320000 |
| H8   | 1.5996840000  | 0.2997670000  | 6.0810950000 |

*CF<sub>3</sub>CH<sub>2</sub>O*

| atom | x             | y             | z            |
|------|---------------|---------------|--------------|
| F5   | -1.0989830000 | -0.8385230000 | 5.1895320000 |
| F6   | -0.1128290000 | -2.5911980000 | 4.3501110000 |
| F7   | 0.6941520000  | -0.5987910000 | 3.9937670000 |
| O14  | 1.2077920000  | -0.3445540000 | 6.7831190000 |
| C54  | 0.9591120000  | -1.5204340000 | 6.1726840000 |
| H55  | 0.4762790000  | -2.2179700000 | 6.8885070000 |
| H56  | 1.9173550000  | -2.0244460000 | 5.9283380000 |

|     |              |               |              |
|-----|--------------|---------------|--------------|
| C57 | 0.1047640000 | -1.3840950000 | 4.9188530000 |
|-----|--------------|---------------|--------------|

*O<sub>2</sub>*

| atom | x            | y            | z             |
|------|--------------|--------------|---------------|
| O47  | 0.0000000000 | 0.0000000000 | 0.6086740000  |
| O49  | 0.0000000000 | 0.0000000000 | -0.6086740000 |

*CF<sub>3</sub>CH<sub>2</sub>OH*

| atom | x             | y             | z            |
|------|---------------|---------------|--------------|
| F5   | -1.1230510000 | -0.9195770000 | 5.2029360000 |
| F6   | -0.0565350000 | -2.6171150000 | 4.3575360000 |
| F7   | 0.6471490000  | -0.5865010000 | 3.9923350000 |
| O14  | 1.1935200000  | -0.2389990000 | 6.7506070000 |
| C54  | 0.9840870000  | -1.5002060000 | 6.1626590000 |
| C57  | 0.1089440000  | -1.4021030000 | 4.9303380000 |
| H7   | 1.8825830000  | 0.2392130000  | 6.2546610000 |
| H8   | 0.4648500000  | -2.1306640000 | 6.8926840000 |
| H9   | 1.9194440000  | -2.0001410000 | 5.8778640000 |

**Mechanism figure 10.**

*Co(salen)(CH<sub>3</sub>CHNO<sub>2</sub>)(CH<sub>3</sub>CH<sub>2</sub>NO<sub>2</sub>)*

| atom | x             | y             | z            |
|------|---------------|---------------|--------------|
| Co50 | -3.0576240000 | 2.5291560000  | 2.6878530000 |
| N51  | -3.2720860000 | 1.3580430000  | 4.1775080000 |
| N52  | -2.7748200000 | 3.8791990000  | 3.9912550000 |
| O53  | -3.5698630000 | 1.2032820000  | 1.4220110000 |
| O54  | -3.1309950000 | 3.7318770000  | 1.2170110000 |
| O55  | -5.4157940000 | 3.0140740000  | 2.9944460000 |
| C56  | -3.5373650000 | 0.0879960000  | 4.1294290000 |
| C57  | -3.2739210000 | 2.0583500000  | 5.4666050000 |
| C58  | -2.8577570000 | 5.1580590000  | 3.7912280000 |
| C59  | -2.4620640000 | 3.3299580000  | 5.3078320000 |
| C60  | -3.6857810000 | -0.0766920000 | 1.6331210000 |
| C61  | -3.1879940000 | 5.0280090000  | 1.3008610000 |
| N62  | -6.2255120000 | 2.5107970000  | 2.1997540000 |
| C63  | -3.6926490000 | -0.6810820000 | 2.9349030000 |
| H64  | -3.6629840000 | -0.4453630000 | 5.0824470000 |
| H65  | -4.3154320000 | 2.3125440000  | 5.7105520000 |
| H66  | -2.8830140000 | 1.4168820000  | 6.2671830000 |
| C67  | -3.0798510000 | 5.7784840000  | 2.5218390000 |
| H68  | -2.7405610000 | 5.8228140000  | 4.6583100000 |
| H69  | -1.3842000000 | 3.1068390000  | 5.3424410000 |
| H70  | -2.6772750000 | 4.0540030000  | 6.1042980000 |

|     |               |               |               |
|-----|---------------|---------------|---------------|
| C71 | -3.8271380000 | -0.9320180000 | 0.5092980000  |
| C72 | -3.3790930000 | 5.7630690000  | 0.0990290000  |
| O73 | -7.0863970000 | 1.7069080000  | 2.5394010000  |
| C74 | -6.1301010000 | 2.9355930000  | 0.7640490000  |
| C75 | -3.8524330000 | -2.0791350000 | 3.0538010000  |
| C76 | -3.1717450000 | 7.1897680000  | 2.4843880000  |
| C77 | -3.9752890000 | -2.2980110000 | 0.6622380000  |
| H78 | -3.8064070000 | -0.4714390000 | -0.4780520000 |
| C79 | -3.4722960000 | 7.1417760000  | 0.1021720000  |
| H80 | -3.4533710000 | 5.1950180000  | -0.8280500000 |
| H81 | -6.4413350000 | 3.9887120000  | 0.7842380000  |
| C82 | -6.9609720000 | 2.0855240000  | -0.1540290000 |
| C83 | -3.9903720000 | -2.8875590000 | 1.9408690000  |
| H84 | -3.8569150000 | -2.5165780000 | 4.0542190000  |
| C85 | -3.3694590000 | 7.8741840000  | 1.3010440000  |
| H86 | -3.0820070000 | 7.7358540000  | 3.4257050000  |
| H87 | -4.0771000000 | -2.9266230000 | -0.2234260000 |
| H88 | -3.6260040000 | 7.6679520000  | -0.8408810000 |
| H92 | -6.6503660000 | 1.0359290000  | -0.1111140000 |
| H93 | -8.0273690000 | 2.1426360000  | 0.0828160000  |
| H94 | -6.8175580000 | 2.4387430000  | -1.1810740000 |
| H95 | -4.1061280000 | -3.9645640000 | 2.0496810000  |
| H96 | -3.4415530000 | 8.9603030000  | 1.2932520000  |
| H91 | -5.0538490000 | 2.9095490000  | 0.5516350000  |
| C46 | -1.0818270000 | 2.2439090000  | 2.5379930000  |
| H47 | -0.7950220000 | 1.9613930000  | 3.5542140000  |
| N48 | -0.8352840000 | 1.0317890000  | 1.7288340000  |
| C49 | -0.3427780000 | 3.4282350000  | 1.9882860000  |
| H50 | 0.7415640000  | 3.2409950000  | 1.9986030000  |
| H51 | -0.6434040000 | 3.6522490000  | 0.9627920000  |
| H52 | -0.5371900000 | 4.3088430000  | 2.6089940000  |
| O56 | -0.6092730000 | 1.1444820000  | 0.5195890000  |
| O57 | -0.8584630000 | -0.0627460000 | 2.3120090000  |

*Co(salen)(CH<sub>3</sub>CHNO<sub>2</sub>)*

| atom | x             | y             | z            |
|------|---------------|---------------|--------------|
| Co50 | -3.5911610000 | 2.4887630000  | 2.6617300000 |
| N51  | -3.4404130000 | 1.1910000000  | 4.0341610000 |
| N52  | -3.1737230000 | 3.7470930000  | 4.0313570000 |
| O53  | -4.1839410000 | 1.1899190000  | 1.4011340000 |
| O54  | -3.9835860000 | 3.8368240000  | 1.3725580000 |
| C56  | -3.2846430000 | -0.0859150000 | 3.8610580000 |
| C57  | -3.5840910000 | 1.7705920000  | 5.3706980000 |
| C58  | -2.8457140000 | 4.9865380000  | 3.8217590000 |
| C59  | -2.9654010000 | 3.1575710000  | 5.3621460000 |

|     |               |               |               |
|-----|---------------|---------------|---------------|
| C60 | -3.7372420000 | -0.0411950000 | 1.4022540000  |
| C61 | -3.4056220000 | 5.0120450000  | 1.3703250000  |
| C63 | -3.2776100000 | -0.7224310000 | 2.5785320000  |
| H64 | -3.1492940000 | -0.7206010000 | 4.7482230000  |
| H65 | -4.6597180000 | 1.8351010000  | 5.5877710000  |
| H66 | -3.1256720000 | 1.1251010000  | 6.1319620000  |
| C67 | -2.8452010000 | 5.6284550000  | 2.5409750000  |
| H68 | -2.5015140000 | 5.5845760000  | 4.6769990000  |
| H69 | -1.8849810000 | 3.0985080000  | 5.5422150000  |
| H70 | -3.4038120000 | 3.7933290000  | 6.1416710000  |
| C71 | -3.7048540000 | -0.7568250000 | 0.1788620000  |
| C72 | -3.3171510000 | 5.7278020000  | 0.1494970000  |
| C75 | -2.8173230000 | -2.0533140000 | 2.4844690000  |
| C76 | -2.2425180000 | 6.9039880000  | 2.4387200000  |
| C77 | -3.2234470000 | -2.0532260000 | 0.1155430000  |
| H78 | -4.0416600000 | -0.2397220000 | -0.7192850000 |
| C79 | -2.7021290000 | 6.9662210000  | 0.0816120000  |
| H80 | -3.7276850000 | 5.2577450000  | -0.7433390000 |
| C83 | -2.7722160000 | -2.7156400000 | 1.2715120000  |
| H84 | -2.4714960000 | -2.5487520000 | 3.3937540000  |
| C85 | -2.1569630000 | 7.5682600000  | 1.2296580000  |
| H86 | -1.8190160000 | 7.3495480000  | 3.3408700000  |
| H87 | -3.1860600000 | -2.5625130000 | -0.8484110000 |
| H88 | -2.6301810000 | 7.4747230000  | -0.8808060000 |
| H95 | -2.3902640000 | -3.7330660000 | 1.2099700000  |
| H96 | -1.6685820000 | 8.5380260000  | 1.1643700000  |
| C46 | -1.6833820000 | 2.5223200000  | 1.9931620000  |
| H47 | -1.4363600000 | 3.5723960000  | 2.1678980000  |
| N48 | -0.7974220000 | 1.7683180000  | 2.9024150000  |
| C49 | -1.5147780000 | 2.0962930000  | 0.5647490000  |
| H50 | -0.4976820000 | 2.3449020000  | 0.2240110000  |
| H51 | -1.6589850000 | 1.0221350000  | 0.4238740000  |
| H52 | -2.2334080000 | 2.6322710000  | -0.0615920000 |
| O56 | -0.5182910000 | 0.5959400000  | 2.6304430000  |
| O57 | -0.3807000000 | 2.3384640000  | 3.9227840000  |

*Co(salen)NO<sub>2</sub>*

| atom | x             | y             | z            |
|------|---------------|---------------|--------------|
| Co50 | -3.5455740000 | 2.3247240000  | 2.6745820000 |
| N51  | -3.4491760000 | 1.1190000000  | 4.1505070000 |
| N52  | -3.0139480000 | 3.6513230000  | 3.9428310000 |
| O53  | -4.0748990000 | 0.9647070000  | 1.4425970000 |
| O54  | -3.7793920000 | 3.5583160000  | 1.2497720000 |
| C56  | -3.3253000000 | -0.1669580000 | 4.0518480000 |
| C57  | -3.3893820000 | 1.8004180000  | 5.4446200000 |

|     |               |               |               |
|-----|---------------|---------------|---------------|
| C58 | -2.7724810000 | 4.8986250000  | 3.6746000000  |
| C59 | -2.6218410000 | 3.0924660000  | 5.2423900000  |
| C60 | -3.7216770000 | -0.2883060000 | 1.5776010000  |
| C61 | -3.3563420000 | 4.7931160000  | 1.2344660000  |
| C63 | -3.3305540000 | -0.8932660000 | 2.8179440000  |
| H64 | -3.1595250000 | -0.7418370000 | 4.9737770000  |
| H65 | -4.4175960000 | 2.0092380000  | 5.7705880000  |
| H66 | -2.9143070000 | 1.1610690000  | 6.2000720000  |
| C67 | -2.8680180000 | 5.5012450000  | 2.3832370000  |
| H68 | -2.4012170000 | 5.5333650000  | 4.4911910000  |
| H69 | -1.5439620000 | 2.8879090000  | 5.2091930000  |
| H70 | -2.8110290000 | 3.8098760000  | 6.0506380000  |
| C71 | -3.6777330000 | -1.1009490000 | 0.4144110000  |
| C72 | -3.3277220000 | 5.4742980000  | -0.0117380000 |
| C75 | -2.9095580000 | -2.2439090000 | 2.8386150000  |
| C76 | -2.3848510000 | 6.8242930000  | 2.2391300000  |
| C77 | -3.2456460000 | -2.4146950000 | 0.4674540000  |
| H78 | -3.9460920000 | -0.6392850000 | -0.5350200000 |
| C79 | -2.8401260000 | 6.7642910000  | -0.1173110000 |
| H80 | -3.6614640000 | 4.9280420000  | -0.8930870000 |
| C83 | -2.8594970000 | -3.0041020000 | 1.6856150000  |
| H84 | -2.5935530000 | -2.6726250000 | 3.7916210000  |
| C85 | -2.3723700000 | 7.4607660000  | 1.0138410000  |
| H86 | -1.9928600000 | 7.3283340000  | 3.1243840000  |
| H87 | -3.1894300000 | -2.9946700000 | -0.4548220000 |
| H88 | -2.8063110000 | 7.2417030000  | -1.0973740000 |
| H95 | -2.5039950000 | -4.0327080000 | 1.7137410000  |
| H96 | -1.9735820000 | 8.4689920000  | 0.9163320000  |
| N48 | -1.7221530000 | 2.0341070000  | 2.1866950000  |
| O56 | -1.4552660000 | 1.9749170000  | 0.9943790000  |
| O57 | -0.8850870000 | 1.9141760000  | 3.0837310000  |

*Co(salen)NO<sub>2</sub>(CH<sub>3</sub>CH<sub>2</sub>NO<sub>2</sub>)*

| atom | x             | y             | z            |
|------|---------------|---------------|--------------|
| Co50 | -3.2747550000 | 2.3314170000  | 2.5890190000 |
| N51  | -3.4018570000 | 1.1531310000  | 4.0944000000 |
| N52  | -2.8232810000 | 3.6672590000  | 3.8892660000 |
| O53  | -3.8885770000 | 0.9859540000  | 1.3775300000 |
| O54  | -3.2249670000 | 3.5250270000  | 1.1078060000 |
| O55  | -5.3647090000 | 2.8758720000  | 2.9951000000 |
| C56  | -3.3841380000 | -0.1397340000 | 4.0340100000 |
| C57  | -3.4472970000 | 1.8729080000  | 5.3639440000 |
| C58  | -2.7214500000 | 4.9372890000  | 3.6577510000 |
| C59  | -2.5822210000 | 3.1132230000  | 5.2224130000 |
| C60  | -3.6741710000 | -0.2898020000 | 1.5481750000 |

|     |               |               |               |
|-----|---------------|---------------|---------------|
| C61 | -3.1180730000 | 4.8194410000  | 1.1766290000  |
| N62 | -6.3585310000 | 2.7824600000  | 2.2471300000  |
| C63 | -3.4077040000 | -0.8999250000 | 2.8200160000  |
| H64 | -3.3536220000 | -0.6995790000 | 4.9794850000  |
| H65 | -4.4909070000 | 2.1617170000  | 5.5501280000  |
| H66 | -3.1147220000 | 1.2331840000  | 6.1917470000  |
| C67 | -2.8830640000 | 5.5639140000  | 2.3814810000  |
| H68 | -2.4941650000 | 5.5957140000  | 4.5082810000  |
| H69 | -1.5214800000 | 2.8448950000  | 5.2966270000  |
| H70 | -2.8092020000 | 3.8551330000  | 5.9985810000  |
| C71 | -3.7309550000 | -1.1415000000 | 0.4144750000  |
| C72 | -3.2430370000 | 5.5557080000  | -0.0327100000 |
| O73 | -7.4687700000 | 2.5194550000  | 2.6827690000  |
| C74 | -6.1867060000 | 3.0533750000  | 0.7803830000  |
| C75 | -3.2117790000 | -2.2976240000 | 2.9001670000  |
| C76 | -2.7785230000 | 6.9734660000  | 2.3213260000  |
| C77 | -3.5240460000 | -2.5048550000 | 0.5276280000  |
| H78 | -3.9282420000 | -0.6809520000 | -0.5527480000 |
| C79 | -3.1432640000 | 6.9339720000  | -0.0511950000 |
| H80 | -3.4149700000 | 4.9897540000  | -0.9479040000 |
| H81 | -6.0595330000 | 4.1434930000  | 0.7405480000  |
| C82 | -7.3508730000 | 2.5665150000  | -0.0354110000 |
| C83 | -3.2578170000 | -3.0998600000 | 1.7752220000  |
| H84 | -3.0151220000 | -2.7370000000 | 3.8800820000  |
| C85 | -2.9078370000 | 7.6621350000  | 1.1308200000  |
| H86 | -2.5891880000 | 7.5143640000  | 3.2503960000  |
| H87 | -3.5619230000 | -3.1250250000 | -0.3690020000 |
| H88 | -3.2459950000 | 7.4613410000  | -1.0003780000 |
| H92 | -7.4910120000 | 1.4857250000  | 0.0740200000  |
| H93 | -8.2838720000 | 3.0688690000  | 0.2340270000  |
| H94 | -7.1411360000 | 2.7746650000  | -1.0902290000 |
| H95 | -3.0916800000 | -4.1729580000 | 1.8513780000  |
| H96 | -2.8259900000 | 8.7470610000  | 1.1049920000  |
| H91 | -5.2254410000 | 2.6002220000  | 0.5203880000  |
| N48 | -1.4549620000 | 1.8588060000  | 2.2807540000  |
| O56 | -1.1109580000 | 1.6397930000  | 1.1251240000  |
| O57 | -0.6856680000 | 1.7916860000  | 3.2452350000  |

*Co(salen)NO<sub>2</sub>(H<sub>2</sub>O)*

| atom | x             | y            | z            |
|------|---------------|--------------|--------------|
| Co50 | -3.5973690000 | 2.3632910000 | 2.7183810000 |
| N51  | -3.3712250000 | 1.1496030000 | 4.1810670000 |
| N52  | -2.9605570000 | 3.6892860000 | 3.9635710000 |
| O53  | -4.2183120000 | 0.9454720000 | 1.5631280000 |
| O54  | -3.9168990000 | 3.6461930000 | 1.3206210000 |

|     |               |               |               |
|-----|---------------|---------------|---------------|
| O55 | -5.6620970000 | 2.6262140000  | 3.1440520000  |
| C56 | -3.1050770000 | -0.1094950000 | 4.0607750000  |
| C57 | -3.3739020000 | 1.8386510000  | 5.4652180000  |
| C58 | -2.5368460000 | 4.8665590000  | 3.6268740000  |
| C59 | -2.6152000000 | 3.1411230000  | 5.2826370000  |
| C60 | -3.6971800000 | -0.2539180000 | 1.6273520000  |
| C61 | -3.3065700000 | 4.7968760000  | 1.2324700000  |
| C63 | -3.1239530000 | -0.8211230000 | 2.8158900000  |
| H64 | -2.8426100000 | -0.6735520000 | 4.9676000000  |
| H65 | -4.4179950000 | 2.0388550000  | 5.7416530000  |
| H66 | -2.9237770000 | 1.2141080000  | 6.2487080000  |
| C67 | -2.6231840000 | 5.4405790000  | 2.3195950000  |
| H68 | -2.0390690000 | 5.4711030000  | 4.3989580000  |
| H69 | -1.5334900000 | 2.9515700000  | 5.2997720000  |
| H70 | -2.8505270000 | 3.8606540000  | 6.0771520000  |
| C71 | -3.7226990000 | -1.0676780000 | 0.4676710000  |
| C72 | -3.3280910000 | 5.4780320000  | -0.0123950000 |
| C75 | -2.6040130000 | -2.1345640000 | 2.7889490000  |
| C76 | -1.9935750000 | 6.6903550000  | 2.1124360000  |
| C77 | -3.1950270000 | -2.3478180000 | 0.4719470000  |
| H78 | -4.1572830000 | -0.6431620000 | -0.4369000000 |
| C79 | -2.6965860000 | 6.6973240000  | -0.1810080000 |
| H80 | -3.8450870000 | 4.9957930000  | -0.8411440000 |
| C83 | -2.6220820000 | -2.8952860000 | 1.6343220000  |
| H84 | -2.1734690000 | -2.5399080000 | 3.7069600000  |
| C85 | -2.0147370000 | 7.3182560000  | 0.8821560000  |
| H86 | -1.4721040000 | 7.1493550000  | 2.9547120000  |
| H87 | -3.2191220000 | -2.9355070000 | -0.4464210000 |
| H88 | -2.7215320000 | 7.1777320000  | -1.1598160000 |
| H95 | -2.2017490000 | -3.8995570000 | 1.6244770000  |
| H96 | -1.5112730000 | 8.2719940000  | 0.7362070000  |
| N48 | -1.7783820000 | 2.0920100000  | 2.1340150000  |
| O56 | -1.5792100000 | 2.0090140000  | 0.9244050000  |
| O57 | -0.8691950000 | 2.0138340000  | 2.9697450000  |
| H40 | -5.9336560000 | 3.3632200000  | 2.5619950000  |
| H41 | -6.0665960000 | 1.8460430000  | 2.7144480000  |

*CH<sub>3</sub>CH<sub>2</sub>NO<sub>2</sub>*

| atom | x             | y            | z             |
|------|---------------|--------------|---------------|
| O55  | -5.4322300000 | 3.1203400000 | 2.9991700000  |
| N62  | -6.3599910000 | 2.7849930000 | 2.2624010000  |
| O73  | -7.4027270000 | 2.2737150000 | 2.6598430000  |
| C74  | -6.1773010000 | 3.0290290000 | 0.7849770000  |
| H81  | -5.9686300000 | 4.1021900000 | 0.7176520000  |
| C82  | -7.3581550000 | 2.5914620000 | -0.0336030000 |



|     |               |              |               |
|-----|---------------|--------------|---------------|
| H92 | -7.5474830000 | 1.5188550000 | 0.0716810000  |
| H93 | -8.2665510000 | 3.1330740000 | 0.2471950000  |
| H94 | -7.1486950000 | 2.7993590000 | -1.0883010000 |
| H91 | -5.2511640000 | 2.4973360000 | 0.5414070000  |

*C<sub>2</sub>H<sub>4</sub>*

| atom | x            | y             | z             |
|------|--------------|---------------|---------------|
| C1   | 0.0000000000 | 0.0000000000  | 0.6670630000  |
| C2   | 0.0000000000 | 0.0000000000  | -0.6670630000 |
| H3   | 0.0000000000 | 0.9253030000  | 1.2449140000  |
| H4   | 0.0000000000 | -0.9253030000 | 1.2449140000  |
| H5   | 0.0000000000 | -0.9253030000 | -1.2449140000 |
| H6   | 0.0000000000 | 0.9253030000  | -1.2449140000 |

*H<sub>2</sub>O*

| atom | x             | y             | z            |
|------|---------------|---------------|--------------|
| O55  | -0.0668750000 | -0.0080230000 | 0.0000000000 |
| H40  | 0.6216640000  | -0.6947500000 | 0.0000000000 |
| H41  | 0.4396910000  | 0.8220820000  | 0.0000000000 |

pK<sub>a</sub> calculations

*Co(salen)OH*

| atom | x             | y             | z            |
|------|---------------|---------------|--------------|
| O49  | -1.4960270000 | 1.8329700000  | 2.2378010000 |
| Co50 | -3.3417760000 | 2.1860970000  | 2.4489150000 |
| N51  | -3.3944810000 | 1.1165880000  | 4.0323210000 |
| N52  | -2.9219890000 | 3.6187730000  | 3.6413090000 |
| O53  | -3.8312340000 | 0.7511780000  | 1.2600080000 |
| O54  | -3.4161240000 | 3.3123620000  | 0.8874130000 |
| O7   | -5.4270610000 | 2.3924760000  | 2.5843990000 |
| C56  | -3.5540070000 | -0.1603780000 | 4.0731630000 |
| C57  | -3.3213300000 | 1.9067820000  | 5.2600280000 |
| C58  | -2.8530840000 | 4.8710910000  | 3.3372700000 |
| C59  | -2.4972190000 | 3.1377260000  | 4.9529710000 |
| C60  | -3.9169310000 | -0.5032810000 | 1.6031690000 |
| C61  | -3.3823430000 | 4.6134610000  | 0.8925450000 |
| C14  | -6.0807250000 | 3.6493330000  | 2.7978220000 |
| C63  | -3.7738210000 | -1.0062830000 | 2.9396670000 |
| H64  | -3.5503880000 | -0.6455280000 | 5.0587880000 |
| H65  | -4.3431610000 | 2.1976420000  | 5.5422060000 |
| H66  | -2.9027960000 | 1.3224740000  | 6.0871210000 |
| C67  | -3.1228840000 | 5.4265310000  | 2.0469360000 |
| H68  | -2.5687050000 | 5.5747960000  | 4.1313230000 |
| H69  | -1.4332960000 | 2.8764870000  | 4.8881620000 |

|     |               |               |               |
|-----|---------------|---------------|---------------|
| H70 | -2.6095800000 | 3.9142600000  | 5.7179760000  |
| C71 | -4.2031910000 | -1.4525720000 | 0.5884530000  |
| C72 | -3.6381270000 | 5.2944800000  | -0.3263840000 |
| C75 | -3.9186960000 | -2.3890430000 | 3.1872330000  |
| C76 | -3.1251700000 | 6.8345680000  | 1.9292310000  |
| C77 | -4.3425700000 | -2.7976880000 | 0.8682060000  |
| H78 | -4.3204230000 | -1.0805030000 | -0.4280480000 |
| C79 | -3.6431500000 | 6.6732560000  | -0.4017520000 |
| H80 | -3.8419470000 | 4.6881970000  | -1.2071530000 |
| C83 | -4.1977970000 | -3.2858730000 | 2.1777530000  |
| H84 | -3.8119950000 | -2.7376690000 | 4.2153380000  |
| C85 | -3.3840030000 | 7.4648760000  | 0.7305660000  |
| H86 | -2.9199210000 | 7.4241620000  | 2.8240380000  |
| H87 | -4.5712790000 | -3.4875490000 | 0.0563500000  |
| H88 | -3.8523520000 | 7.1514640000  | -1.3585510000 |
| H95 | -4.3106700000 | -4.3460230000 | 2.3921050000  |
| H96 | -3.3871220000 | 8.5506260000  | 0.6622850000  |
| H39 | -1.4085640000 | 1.8454840000  | 1.2734060000  |
| H40 | -7.1621420000 | 3.5010570000  | 2.8538100000  |
| H41 | -5.7262080000 | 4.0390590000  | 3.7515660000  |
| H42 | -5.8498280000 | 4.3639300000  | 2.0029790000  |
| H43 | -5.7215690000 | 2.0206310000  | 1.7357730000  |

*Co(salen)OH<sub>2</sub><sup>+</sup>*

| atom | x             | y             | z            |
|------|---------------|---------------|--------------|
| O49  | -1.4960270000 | 1.8329700000  | 2.2378010000 |
| Co50 | -3.3417760000 | 2.1860970000  | 2.4489150000 |
| N51  | -3.3944810000 | 1.1165880000  | 4.0323210000 |
| N52  | -2.9219890000 | 3.6187730000  | 3.6413090000 |
| O53  | -3.8312340000 | 0.7511780000  | 1.2600080000 |
| O54  | -3.4161240000 | 3.3123620000  | 0.8874130000 |
| O7   | -5.4270610000 | 2.3924760000  | 2.5843990000 |
| C56  | -3.5540070000 | -0.1603780000 | 4.0731630000 |
| C57  | -3.3213300000 | 1.9067820000  | 5.2600280000 |
| C58  | -2.8530840000 | 4.8710910000  | 3.3372700000 |
| C59  | -2.4972190000 | 3.1377260000  | 4.9529710000 |
| C60  | -3.9169310000 | -0.5032810000 | 1.6031690000 |
| C61  | -3.3823430000 | 4.6134610000  | 0.8925450000 |
| C14  | -6.0807250000 | 3.6493330000  | 2.7978220000 |
| C63  | -3.7738210000 | -1.0062830000 | 2.9396670000 |
| H64  | -3.5503880000 | -0.6455280000 | 5.0587880000 |
| H65  | -4.3431610000 | 2.1976420000  | 5.5422060000 |
| H66  | -2.9027960000 | 1.3224740000  | 6.0871210000 |
| C67  | -3.1228840000 | 5.4265310000  | 2.0469360000 |
| H68  | -2.5687050000 | 5.5747960000  | 4.1313230000 |

|     |               |               |               |
|-----|---------------|---------------|---------------|
| H69 | -1.4332960000 | 2.8764870000  | 4.8881620000  |
| H70 | -2.6095800000 | 3.9142600000  | 5.7179760000  |
| C71 | -4.2031910000 | -1.4525720000 | 0.5884530000  |
| C72 | -3.6381270000 | 5.2944800000  | -0.3263840000 |
| C75 | -3.9186960000 | -2.3890430000 | 3.1872330000  |
| C76 | -3.1251700000 | 6.8345680000  | 1.9292310000  |
| C77 | -4.3425700000 | -2.7976880000 | 0.8682060000  |
| H78 | -4.3204230000 | -1.0805030000 | -0.4280480000 |
| C79 | -3.6431500000 | 6.6732560000  | -0.4017520000 |
| H80 | -3.8419470000 | 4.6881970000  | -1.2071530000 |
| C83 | -4.1977970000 | -3.2858730000 | 2.1777530000  |
| H84 | -3.8119950000 | -2.7376690000 | 4.2153380000  |
| C85 | -3.3840030000 | 7.4648760000  | 0.7305660000  |
| H86 | -2.9199210000 | 7.4241620000  | 2.8240380000  |
| H87 | -4.5712790000 | -3.4875490000 | 0.0563500000  |
| H88 | -3.8523520000 | 7.1514640000  | -1.3585510000 |
| H95 | -4.3106700000 | -4.3460230000 | 2.3921050000  |
| H96 | -3.3871220000 | 8.5506260000  | 0.6622850000  |
| H39 | -1.4085640000 | 1.8454840000  | 1.2734060000  |
| H40 | -7.1621420000 | 3.5010570000  | 2.8538100000  |
| H41 | -5.7262080000 | 4.0390590000  | 3.7515660000  |
| H42 | -5.8498280000 | 4.3639300000  | 2.0029790000  |
| H43 | -5.7215690000 | 2.0206310000  | 1.7357730000  |
| H44 | -1.1940973670 | 0.8471161904  | 2.621116487   |

## References

- 1 E. Bill, *eview & esimX*, Max-Planck-Institute for Chemical Energy Conversion, Mülheim; available from the author by mail to: eckhard.bill@cec.mpg.de, 2016.
- 2 Rigaku Oxford Diffraction, *CrysAlis PRO 1.171.40.21a*, 2019.
- 3 C. B. Hübschle, G. M. Sheldrick and B. Dittrich, *J Appl Crystallogr*, 2011, **44**, 1281–1284.
- 4 G. M. Sheldrick, *Acta Crystallogr. A Found. Adv.*, 2015, **71**, 3–8.
- 5 G. M. Sheldrick, *Acta Crystallogr. C Struct. Chem.*, 2015, **71**, 3–8.
- 6 M. Cesari, C. Neri, G. Perego, E. Perrotti and A. Zazzetta, *J. Chem. Soc. D*, 1970, **0**, 276–277.
- 7 A. D. Bochevarov, E. Harder, T. F. Hughes, J. R. Greenwood, D. A. Braden, D. M. Philipp, D. Rinaldo, M. D. Halls, J. Zhang and R. A. Friesner, *Int. J. Quantum Chem.*, 2013, **113**, 2110–2142.
- 8 Schrödinger Release 2019-1, *Jaguar*, Schrödinger, LLC, New York, NY, 2019.
- 9 Y. Zhao and D. G. Truhlar, *J. Chem. Phys.*, 2006, **125**, 194101.
- 10 P. J. Hay and W. R. Wadt, *J. Chem. Phys.*, 1985, **82**, 299–310.
- 11 F. Neese, *WIREs Comput Mol Sci*, 2012, **2**, 73–78.
- 12 F. Neese, *J. Chem. Phys.*, 2003, **118**, 3939–3948.
- 13 F. Neese, *J. Chem. Phys.*, 2005, **122**, 34107.
- 14 M. Calligaris, G. Nardin, L. Randaccio and A. Ripamonti, *J. Chem. Soc. A*, 1970, **0**, 1069–1074.
- 15 P. Lian, R. C. Johnston, J. M. Parks and J. C. Smith, *J. Phys. Chem. A*, 2018, **122**, 4366–4374.

- 16 C. P. Kelly, C. J. Cramer and D. G. Truhlar, *J. Phys. Chem. B*, 2007, **111**, 408–422.
- 17 J. M. Fraile, N. García, C. I. Herrerías and J. A. Mayoral, *Catal. Sci. Technol.*, 2013, **3**, 436–443.
- 18 T. G. Appleton, *J. Chem. Educ.*, 1977, **54**, 443.
